# Supplementary material for: Human Genome-Wide RNAi Screen for Host Factors That Modulate Intracellular Salmonella Growth
Source: PLoS One. 2012 Jun 11;7(6):e38097. doi: 10.1371/journal.pone.0038097 (PMC3372477; doi:10.1371/journal.pone.0038097)
Supplement: Table S1 — The uniprot derived gene annotations and the raw numerical data for the down hits. (XLSX) [file pone.0038097.s004.xlsx]

## Sheet: Sheet1
Down Hits
Gene Symbol	Gene names	Entrez ID	UniProt Accession	Standard Deviation Plate 1	Standard Deviation Plate 2	2D Standard Devitation	P-value	Protein names	Gene ontology	Interacts with (Uniprot Accession)	Function	Subcellular Location	Protein family
AADACL1	NCEH1 AADACL1 KIAA1363	57552	Q6PIU2	-2.56787	-2.3709	-3.49501	0.000237021	Neutral cholesterol ester hydrolase 1 (NCEH) (EC 3.1.1.-) (Arylacetamide deacetylase-like 1)	carboxylesterase activity; endoplasmic reticulum; integral to membrane; lipid catabolic process; microsome		Hydrolyzes 2-acetyl monoalkylglycerol ether, the penultimate precursor of the pathway for de novo synthesis of platelet-activating factor. May be responsible for cholesterol ester hydrolysis in macrophages, thereby contributing to the development of atherosclerosis. Also involved in organ detoxification by hydrolyzing exogenous organophosphorus compounds. May contribute to cancer pathogenesis by …	Membrane; Single-pass type II membrane protein (Probable). Microsome (By similarity).	'GDXG' lipolytic enzyme family
ABHD3	ABHD3 LABH3	171586	Q8WU67	-4.92359	-2.92324	-5.726	5.14145e-09	Abhydrolase domain-containing protein 3 (EC 3.1.1.-) (Lung alpha/beta hydrolase 3)	carboxylesterase activity; integral to membrane			Membrane; Single-pass type II membrane protein (Potential).	AB hydrolase superfamily, AB hydrolase 4 family
ACTR6	ACTR6 CDA12	64431	Q9GZN1	-3.4001	-3.54002	-4.9084	4.59111e-07	Actin-related protein 6 (hArp6) (hARPX)	cytoplasm; cytoskeleton			Cytoplasm, cytoskeleton (By similarity).	Actin family, ARP6 subfamily
ADAD2	ADAD2 TENRL	161931	Q8NCV1	-5.12982	-3.47609	-6.19664	2.88412e-10	Adenosine deaminase domain-containing protein 2 (Testis nuclear RNA-binding protein-like)	RNA processing; adenosine deaminase activity; double-stranded RNA binding; intracellular				ADAD family
ADIG	ADIG	149685	Q0VDE8	-5.98204	-2.65468	-6.54463	2.98218e-11	Adipogenin	brown fat cell differentiation; cytoplasm; integral to membrane; nucleus; positive regulation of fat cell differentiation; white fat cell differentiation		Plays a role in stimulating adipocyte differentiation and development (By similarity).	Membrane; Single-pass membrane protein (Potential). Nucleus (By similarity).	Adipogenin family
ALG14	ALG14	199857	Q96F25	-2.39479	-4.65067	-5.23104	8.42782e-08	UDP-N-acetylglucosamine transferase subunit ALG14 homolog	N-acetylglucosaminyldiphosphodolichol N-acetylglucosaminyltransferase activity; dolichol-linked oligosaccharide biosynthetic process; endoplasmic reticulum membrane; integral to membrane; post-translational protein modification; protein N-linked glycosylation via asparagine		May be involved in protein N-glycosylation. May play a role in the second step of the dolichol-linked oligosaccharide pathway. May anchor the catalytic subunit ALG13 to the ER.	Endoplasmic reticulum membrane; Single-pass membrane protein (Probable).	ALG14 family
AMDHD2	AMDHD2 CGI-14	51005	Q9Y303	-2.32789	-3.42633	-4.14232	1.71904e-05	Putative N-acetylglucosamine-6-phosphate deacetylase (EC 3.5.1.25) (Amidohydrolase domain-containing protein 2) (GlcNAc 6-P deacetylase)	N-acetylglucosamine metabolic process; N-acetylglucosamine-6-phosphate deacetylase activity				NagA family
ANKRD1	ANKRD1 C193 CARP HA1A2	27063	Q15327	-5.15746	-2.8956	-5.91472	1.66221e-09	Ankyrin repeat domain-containing protein 1 (Cardiac ankyrin repeat protein) (Cytokine-inducible gene C-193 protein) (Cytokine-inducible nuclear protein)	DNA binding; cellular lipid metabolic process; defense response; signal transduction		May play an important role in endothelial cell activation. May act as a nuclear transcription factor that negatively regulates the expression of cardiac genes. Induction seems to be correlated with apoptotic cell death in hepatoma cells.	Nucleus.
ANKRD13C	ANKRD13C	81573	Q8N6S4	-2.78422	-5.01291	-5.73421	4.89848e-09	Ankyrin repeat domain-containing protein 13C	endoplasmic reticulum membrane; perinuclear region of cytoplasm; protein retention in ER lumen; receptor binding; regulation of anoikis; regulation of receptor biosynthetic process		Acts as a molecular chaperone for G protein-coupled receptors, regulating their biogenesis and exit from the ER.	Endoplasmic reticulum membrane. Note=Associated with the cytosolic side.
ANKRD38	KANK4 ANKRD38	163782	Q5T7N3	-5.02328	-4.6786	-6.8646	3.33397e-12	KN motif and ankyrin repeat domain-containing protein 4 (Ankyrin repeat domain-containing protein 38)
APLF	APLF C2orf13 PALF XIP1	200558	Q8IW19	-5.11177	-2.5652	-5.71931	5.34798e-09	Aprataxin and PNK-like factor (EC 4.2.99.18) (Apurinic-apyrimidinic endonuclease APLF) (PNK and APTX-like FHA domain-containing protein) (XRCC1-interacting protein 1)	3'-5' exonuclease activity; DNA-(apurinic or apyrimidinic site) lyase activity; cytosol; double-strand break repair; endodeoxyribonuclease activity; metal ion binding; nucleotide binding; nucleus; protein binding; single strand break repair	P18887	Nuclease involved in single-strand and double-strand DNA break repair. Recruited to sites of DNA damage through interaction with poly(ADP-ribose), a polymeric post-translational modification synthesized transiently at sites of chromosomal damage to accelerate DNA strand break repair reactions. Displays apurinic-apyrimidinic (AP) endonuclease and 3'-5' exonuclease activities in vitro. Also able to…	Nucleus. Cytoplasm, cytosol. Note=Localizes to DNA damage sites. Accumulates at single-strand breaks and double-strand breaks via the PBZ-type zinc fingers.	APLF family
ARL17P1	ARL17A ARL17P1; ARL17B ARF1P2 ARL17A PRO2667	51326	Q8IVW1	-2.31489	-2.24166	-3.22239	0.000635638	ADP-ribosylation factor-like protein 17 (ADP-ribosylation factor 7 variant)	GTP binding; Golgi apparatus; protein transport; vesicle-mediated transport		GTP-binding protein that functions as an allosteric activator of the cholera toxin catalytic subunit, an ADP-ribosyltransferase. Involved in protein trafficking; may modulate vesicle budding and uncoating within the Golgi apparatus (By similarity).	Golgi apparatus (By similarity).	Small GTPase superfamily, Arf family
ARX	ARX	170302	Q96QS3	-4.71235	-4.58089	-6.57197	2.48267e-11	Homeobox protein ARX (Aristaless-related homeobox)	nucleus; regulation of transcription, DNA-dependent; sequence-specific DNA binding; sequence-specific DNA binding transcription factor activity; transcription regulator activity		Transcription factor required for normal brain development. May be important for maintenance of specific neuronal subtypes in the cerebral cortex and axonal guidance in the floor plate.	Nucleus (By similarity).	Paired homeobox family, Bicoid subfamily
ASGR2	ASGR2 CLEC4H2	433	P07307	-2.12965	-2.63971	-3.39168	0.000347333	Asialoglycoprotein receptor 2 (ASGP-R 2) (ASGPR 2) (C-type lectin domain family 4 member H2) (Hepatic lectin H2) (HL-2)	asialoglycoprotein receptor activity; cell surface receptor linked signaling pathway; endocytosis; focal adhesion; integral to membrane; nucleolus; protein binding; sugar binding	Q96G23	Mediates the endocytosis of plasma glycoproteins to which the terminal sialic acid residue on their complex carbohydrate moieties has been removed. The receptor recognizes terminal galactose and N-acetylgalactosamine units. After ligand binding to the receptor, the resulting complex is internalized and transported to a sorting organelle, where receptor and ligand are disassociated. The receptor t…	Membrane; Single-pass type II membrane protein.
ASPHD1	ASPHD1	253982	Q5U4P2	-2.46721	-2.2026	-3.30735	0.00047092	Aspartate beta-hydroxylase domain-containing protein 1 (EC 1.14.11.-)	integral to endoplasmic reticulum membrane; oxidation-reduction process; oxidoreductase activity, acting on single donors with incorporation of molecular oxygen, incorporation of two atoms of oxygen; peptide-aspartate beta-dioxygenase activity; peptidyl-amino acid modification			Membrane; Single-pass type II membrane protein (Potential).	Aspartyl/asparaginyl beta-hydroxylase family
ATG9A	ATG9A APG9L1	79065	Q7Z3C6	-2.36824	-2.83824	-3.69651	0.000109294	Autophagy-related protein 9A (APG9-like 1) (mATG9)	Golgi apparatus; autophagic vacuole assembly; autophagic vacuole membrane; cytoplasmic vesicle; integral to membrane; late endosome membrane; protein transport		Plays a role in autophagy. Cycles between a juxta-nuclear trans-Golgi network compartment and late endosomes. Nutrient starvation induces accumulation on autophagosomes. Starvation-dependent trafficking requires ULK1, ATG13 and FAM48A.	Cytoplasmic vesicle, autophagosome membrane; Multi-pass membrane protein (By similarity). Golgi apparatus, trans-Golgi network membrane; Multi-pass membrane protein. Late endosome membrane; Multi-pass membrane protein.	ATG9 family
ATP6V0D1	ATP6V0D1 ATP6D VPATPD	9114	P61421	-4.53497	-2.74137	-5.29916	5.81697e-08	V-type proton ATPase subunit d 1 (V-ATPase subunit d 1) (32 kDa accessory protein) (V-ATPase 40 kDa accessory protein) (V-ATPase AC39 subunit) (p39) (Vacuolar proton pump subunit d 1)	ATP hydrolysis coupled proton transport; cellular iron ion homeostasis; endosome membrane; insulin receptor signaling pathway; proton-transporting V-type ATPase, V0 domain; transferrin transport; vacuolar proton-transporting V-type ATPase complex		Subunit of the integral membrane V0 complex of vacuolar ATPase. Vacuolar ATPase is responsible for acidifying a variety of intracellular compartments in eukaryotic cells, thus providing most of the energy required for transport processes in the vacuolar system. May play a role in coupling of proton transport and ATP hydrolysis (By similarity).		V-ATPase V0D/AC39 subunit family
ATP6V1A	ATP6V1A ATP6A1 ATP6V1A1 VPP2	523	P38606	-3.58458	-3.80662	-5.22872	8.53424e-08	V-type proton ATPase catalytic subunit A (V-ATPase subunit A) (EC 3.6.3.14) (V-ATPase 69 kDa subunit) (Vacuolar ATPase isoform VA68) (Vacuolar proton pump subunit alpha)	ATP binding; ATP hydrolysis coupled proton transport; cellular iron ion homeostasis; cytosol; hydrogen ion transporting ATP synthase activity, rotational mechanism; insulin receptor signaling pathway; integral to plasma membrane; proton-transporting ATPase activity, rotational mechanism; proton-transporting V-type ATPase, V1 domain; transferrin transport		Catalytic subunit of the peripheral V1 complex of vacuolar ATPase. V-ATPase vacuolar ATPase is responsible for acidifying a variety of intracellular compartments in eukaryotic cells.		ATPase alpha/beta chains family
ATXN10	ATXN10 SCA10	25814	Q9UBB4	-4.45925	-4.05485	-6.02717	8.34299e-10	Ataxin-10 (Brain protein E46 homolog) (Spinocerebellar ataxia type 10 protein)	cell death; dendrite; neuron projection development; neuronal cell body; perinuclear region of cytoplasm	P35613; Q9Y2Q3; Q9Y5V3; Q9Y6J8	Necessary for the survival of cerebellar neurons (By similarity). Induces neuritogenesis by activating the Ras-MAP kinase pathway (By similarity). May play a role in the maintenance of a critical intracellular glycosylation level and homeostasis (By similarity).	Cytoplasm, perinuclear region.	Ataxin-10 family
B3GALT4	B3GALT4 GALT4	8705	O96024	-2.6594	-2.27808	-3.50172	0.00023113	Beta-1,3-galactosyltransferase 4 (Beta-1,3-GalTase 4) (Beta3Gal-T4) (Beta3GalT4) (GalT4) (b3Gal-T4) (EC 2.4.1.62) (Gal-T2) (Ganglioside galactosyltransferase) (UDP-galactose:beta-N-acetyl-galactosamine-beta-1,3-galactosyltransferase)	Golgi membrane; UDP-galactose:beta-N-acetylglucosamine beta-1,3-galactosyltransferase activity; ganglioside galactosyltransferase activity; integral to membrane; protein glycosylation		Involved in GM1/GD1B/GA1 ganglioside biosynthesis.	Golgi apparatus membrane; Single-pass type II membrane protein.	Glycosyltransferase 31 family
BCDO2	BCO2 BCDO2	83875	Q9BYV7	-4.05773	-2.13198	-4.58372	2.28384e-06	Beta,beta-carotene 9',10'-oxygenase (EC 1.14.99.n2) (B-diox-II) (Beta-carotene dioxygenase 2)	carotene metabolic process; intracellular; metal ion binding; oxidation-reduction process; oxidoreductase activity, acting on single donors with incorporation of molecular oxygen, incorporation of two atoms of oxygen; retinal metabolic process; retinoic acid metabolic process		Asymmetrically cleaves beta-carotene at the 9',10' double bond resulting in the formation of beta-apo-10'-carotenal and beta-ionone. Besides beta-carotene, lycopene is also oxidatively cleaved. The apocarotenals formed by this enzyme may be the precursors for the biosynthesis of retinoic acid or exert unknown physiological effects.		Carotenoid oxygenase family
C11orf42	C11orf42	160298	Q8N5U0	-5.4177	-2.2292	-5.8584	2.33677e-09	Uncharacterized protein C11orf42
C14orf142	C14orf142	84520	Q9BXV9	-2.16448	-3.77156	-4.34852	6.85285e-06	Uncharacterized protein C14orf142
C14orf21	C14orf21 KIAA2021	161424	Q86U38	-2.6587	-2.23632	-3.47416	0.000256228	Pumilio domain-containing protein C14orf21	RNA binding
C14orf93	C14orf93	60686	Q9H972	-2.64861	-3.97509	-4.77666	8.9115e-07	Uncharacterized protein C14orf93	extracellular region			Secreted (Potential).
C1orf177	C1orf177	163747	Q3ZCV2	-2.2839	-3.1127	-3.86071	5.65285e-05	Uncharacterized protein C1orf177
C1orf55	C1orf55	163859	Q6IQ49	-2.14265	-3.02837	-3.70971	0.000103747	UPF0667 protein C1orf55					UPF0667 family
C1orf57	NTPCR C1orf57	84284	Q9BSD7	-2.57728	-2.967	-3.93007	4.24606e-05	Cancer-related nucleoside-triphosphatase (NTPase) (EC 3.6.1.15) (Nucleoside triphosphate phosphohydrolase)	ATP binding; nucleoside-triphosphatase activity; transferase activity		Has nucleotide phosphatase activity towards ATP, GTP, CTP, TTP and UTP. Hydrolyzes nucleoside diphosphates with lower efficiency.		THEP1 NTPase family
C1orf89	RSG1 C1orf89	79363	Q9BU20	-2.6024	-2.17411	-3.39105	0.000348124	REM2- and Rab-like small GTPase 1	GTP binding; cellular protein localization; cilium assembly; microtubule basal body; regulation of exocytosis; regulation of vesicle fusion; small GTPase mediated signal transduction		Potential effector of the planar cell polarity signaling pathway. Plays a role in targeted membrane trafficking most probably at the level of vesicle fusion with membranes. Involved in cilium biogenesis by regulating the transport of cargo proteins to the basal body and to the apical tips of cilia. More generally involved in exocytosis in secretory cells (By similarity).	Cytoplasm, cytoskeleton, cilium basal body (By similarity).	Small GTPase superfamily, Rab family
C1QL4	C1QL4	338761	Q86Z23	-3.37271	-2.76622	-4.36201	6.44352e-06	Complement C1q-like protein 4	collagen			Secreted (Potential).
C20orf111	C20orf111 BM-038 HSPC168 HSPC207	51526	Q9NX31	-5.86249	-2.42492	-6.34422	1.1178e-10	Uncharacterized protein C20orf111
C20orf46	C20orf46	55321	Q9NUR3	-3.04149	-2.43692	-3.89734	4.86279e-05	Transmembrane protein C20orf46	integral to membrane; protein binding	P00519		Membrane; Multi-pass membrane protein (Potential).
C2CD2	C2CD2 C21orf25 C21orf258	25966	Q9Y426	-2.55209	-3.82433	-4.59768	2.13609e-06	C2 domain-containing protein 2	cytosol; extracellular region; nucleus			Secreted (Potential).
C2orf53	C2orf53	339779	Q53SZ7	-2.3557	-3.30589	-4.05934	2.46059e-05	Uncharacterized protein C2orf53
C2orf55	C2orf55	343990	Q6NV74	-2.68929	-3.43068	-4.35912	6.52947e-06	Uncharacterized protein C2orf55
C5orf22	C5orf22	55322	Q49AR2	-3.57586	-5.99599	-6.98131	1.46221e-12	UPF0489 protein C5orf22					UPF0489 family
C6orf204	C6orf204	387119	Q5SZL2	-4.82066	-2.18929	-5.29451	5.96696e-08	Coiled-coil domain-containing protein C6orf204 (Serologically defined breast cancer antigen NY-BR-15)					CCDC21 family
C6orf211	C6orf211	79624	Q9H993	-2.12537	-2.5319	-3.30571	0.000473683	UPF0364 protein C6orf211	protein binding	O00422			UPF0364 family
CBX6	CBX6	23466	O95503	-2.58892	-2.58713	-3.66002	0.000126098	Chromobox protein homolog 6	chromatin; chromatin assembly or disassembly; chromatin binding; chromatin modification; nucleus; regulation of transcription, DNA-dependent; transcription, DNA-dependent		Involved in maintaining the transcriptionally repressive state of genes. Modifies chromatin, rendering it heritably changed in its expressibility (Probable).	Nucleus (By similarity).
CCDC135	CCDC135 C16orf50	84229	Q8IY82	-2.27275	-4.16168	-4.74183	1.05897e-06	Coiled-coil domain-containing protein 135	cytoplasm
CCDC90B	CCDC90B CUA003 MDS011 MDS025	60492	Q9GZT6	-3.45453	-2.49798	-4.26306	1.00821e-05	Coiled-coil domain-containing protein 90B, mitochondrial	integral to membrane; mitochondrion			Mitochondrion. Membrane; Single-pass membrane protein (Potential).	CCDC90 family
CCL22	CCL22 MDC SCYA22 A-152E5.1	6367	O00626	-2.468	-3.38472	-4.18896	1.40117e-05	C-C motif chemokine 22 (CC chemokine STCP-1) (MDC(1-69)) (Macrophage-derived chemokine) (Small-inducible cytokine A22) (Stimulated T-cell chemotactic protein 1) [Cleaved into: MDC(3-69); MDC(5-69); MDC(7-69)]	cell-cell signaling; chemokine activity; chemotaxis; extracellular space; immune response; inflammatory response; response to virus; signal transduction		May play a role in the trafficking of activated/effector T-lymphocytes to inflammatory sites and other aspects of activated T-lymphocyte physiology. Chemotactic for monocytes, dendritic cells and natural killer cells. Mild chemoattractant for primary activated T-lymphocytes and a potent chemoattractant for chronically activated T-lymphocytes but has no chemoattractant activity for neutrophils, eo…	Secreted.	Intercrine beta (chemokine CC) family
CD163	CD163 M130	9332	Q86VB7	-4.03642	-3.55798	-5.38069	3.70995e-08	Scavenger receptor cysteine-rich type 1 protein M130 (Hemoglobin scavenger receptor) (CD antigen CD163) [Cleaved into: Soluble CD163 (sCD163)]	acute-phase response; extracellular region; integral to plasma membrane; protein binding; scavenger receptor activity		Acute phase-regulated receptor involved in clearance and endocytosis of hemoglobin/haptoglobin complexes by macrophages and may thereby protect tissues from free hemoglobin-mediated oxidative damage. May play a role in the uptake and recycling of iron, via endocytosis of hemoglobin/haptoglobin and subsequent breakdown of heme. Binds hemoglobin/haptoglobin complexes in a calcium-dependent and pH-d…	Soluble CD163: Secreted. ; Cell membrane; Single-pass type I membrane protein. Note=Isoform 1 and isoform 2 show a lower surface expression when expressed in cells.
CD48	CD48 BCM1 BLAST1	962	P09326	-2.21161	-2.33995	-3.21972	0.000641584	CD48 antigen (B-lymphocyte activation marker BLAST-1) (BCM1 surface antigen) (Leukocyte antigen MEM-102) (TCT.1) (CD antigen CD48)	blood coagulation; defense response; integral to plasma membrane; leukocyte migration; membrane raft; protein binding	Q9BZW8	Ligand for CD2. Might facilitate interaction between activated lymphocytes. Probably involved in regulating T-cell activation.	Cell membrane; Lipid-anchor, GPI-anchor.
CDC14C	CDC14C CDC14B2	168448	A4D256	-5.06461	-3.78826	-6.32465	1.26906e-10	Dual specificity protein phosphatase CDC14C (EC 3.1.3.16) (EC 3.1.3.48) (CDC14 cell division cycle 14 homolog C)	integral to membrane; nucleolus; protein tyrosine phosphatase activity; protein tyrosine/serine/threonine phosphatase activity		Dual-specificity phosphatase. Preferentially dephosphorylates proteins modified by proline-directed kinases (By similarity).	Membrane; Single-pass membrane protein (Potential). Nucleus, nucleolus. Note=Nucleolar during interphase (By similarity).	Protein-tyrosine phosphatase family, Non-receptor class CDC14 subfamily
CENPM	CENPM C22orf18 ICEN39 PANE1	79019	Q9NSP4	-4.11455	-2.33072	-4.72883	1.12911e-06	Centromere protein M (CENP-M) (Interphase centromere complex protein 39) (Proliferation-associated nuclear element protein 1)	condensed chromosome kinetochore; cytosol; mitotic prometaphase; nucleus		Component of the CENPA-NAC (nucleosome-associated) complex, a complex that plays a central role in assembly of kinetochore proteins, mitotic progression and chromosome segregation. The CENPA-NAC complex recruits the CENPA-CAD (nucleosome distal) complex and may be involved in incorporation of newly synthesized CENPA into centromeres.	Nucleus. Cytoplasm. Chromosome, centromere, kinetochore. Note=Nuclear in non-confluent cells and cytoplasmic in confluent or dividing cells (By similarity). Localizes in the kinetochore domain of centromeres.
CEP152	CEP152 KIAA0912	22995	O94986	-2.9421	-2.34857	-3.76454	8.34277e-05	Centrosomal protein of 152 kDa (Cep152)	G2/M transition of mitotic cell cycle; cytosol; microtubule organizing center			Cytoplasm, cytoskeleton, centrosome.
CITED4	CITED4 MRG2	163732	Q96RK1	-4.04773	-4.68901	-6.19443	2.9248e-10	Cbp/p300-interacting transactivator 4 (MSG1-related protein 2) (MRG-2)	cytoplasm; nucleus; regulation of transcription, DNA-dependent; transcription regulator activity; transcription, DNA-dependent		Acts as transcriptional coactivator for TFAP2/AP-2. Enhances estrogen-dependent transactivation mediated by estrogen receptors. May function as an inhibitor of transactivation by HIF1A by disrupting HIF1A interaction with CREBBP. May be involved in regulation of gene expression during development and differentiation of blood cells, endothelial cells and mammary epithelial cells.	Nucleus. Cytoplasm.	CITED family
CLIC1	CLIC1 G6 NCC27	1192	O00299	-2.63497	-3.04008	-4.02308	2.87209e-05	Chloride intracellular channel protein 1 (Chloride channel ABP) (Nuclear chloride ion channel 27) (NCC27) (Regulatory nuclear chloride ion channel protein) (hRNCC)	brush border; chloride channel complex; cytoplasm; membrane fraction; nuclear membrane; plasma membrane; protein binding; signal transduction; soluble fraction; voltage-gated chloride channel activity	O15116	Can insert into membranes and form chloride ion channels. Channel activity depends on the pH. Membrane insertion seems to be redox-regulated and may occur only under oxydizing conditions. Involved in regulation of the cell cycle.	Nucleus. Nucleus membrane; Single-pass membrane protein (Probable). Cytoplasm. Cell membrane; Single-pass membrane protein (Probable). Note=Mostly in the nucleus including in the nuclear membrane. Small amount in the cytoplasm and the plasma membrane. Exists both as soluble cytoplasmic protein and as membrane protein with probably a single transmembrane domain.	Chloride channel CLIC family
CLSTN2	CLSTN2 CS2	64084	Q9H4D0	-3.86514	-5.13084	-6.42377	6.647e-11	Calsyntenin-2 (Alcadein-gamma) (Alc-gamma)	Golgi membrane; calcium ion binding; endoplasmic reticulum membrane; homophilic cell adhesion; integral to membrane; plasma membrane		May modulate calcium-mediated postsynaptic signals (By similarity).	Cell membrane; Single-pass type I membrane protein (Potential). Endoplasmic reticulum membrane. Golgi apparatus membrane. Note=Most prominent in the postsynaptic specializations of asymmetric (type I) synapses with both axodendritic and axospinous localization (By similarity).
COQ10B	COQ10B	80219	Q9H8M1	-2.20269	-2.93248	-3.6676	0.00012242	Coenzyme Q-binding protein COQ10 homolog B, mitochondrial	mitochondrial inner membrane		Required for the function of coenzyme Q in the respiratory chain. May serve as a chaperone or may be involved in the transport of Q6 from its site of synthesis to the catalytic sites of the respiratory complexes (By similarity).	Mitochondrion inner membrane; Peripheral membrane protein; Matrix side (By similarity).	COQ10 family
COX7B2	COX7B2	170712	Q8TF08	-5.07947	-4.73041	-6.94102	1.9464e-12	Cytochrome c oxidase subunit 7B2, mitochondrial (Cytochrome c oxidase polypeptide VIIb2)	cytochrome-c oxidase activity; integral to membrane; mitochondrial respiratory chain		This protein is one of the nuclear-coded polypeptide chains of cytochrome c oxidase, the terminal oxidase in mitochondrial electron transport.	Mitochondrion inner membrane (By similarity).	Cytochrome c oxidase VIIb family
CPNE5	CPNE5 KIAA1599	57699	Q9HCH3	-3.24428	-5.60552	-6.47667	4.68849e-11	Copine-5 (Copine V)			May function in membrane trafficking. Exhibits calcium-dependent phospholipid binding properties (By similarity).		Copine family
CREG2	CREG2	200407	Q8IUH2	-3.51835	-2.74311	-4.46133	4.07267e-06	Protein CREG2	FMN binding; extracellular region			Secreted.	CREG family
CWC22	CWC22 KIAA1604 NCM	57703	Q9HCG8	-2.46516	-6.30677	-6.77144	6.37548e-12	Pre-mRNA-splicing factor CWC22 homolog (Nucampholin homolog) (fSAPb)	RNA binding; catalytic step 2 spliceosome; nuclear mRNA splicing, via spliceosome; protein binding; regulation of nuclear mRNA splicing, via spliceosome	Q96B26	May be involved in pre-mRNA splicing.	Nucleus.	CWC22 family
CYB5D2	CYB5D2	124936	Q8WUJ1	-2.1753	-4.32021	-4.83695	6.59221e-07	Neuferricin (Cytochrome b5 domain-containing protein 2)	extracellular region; heme binding; nervous system development		Heme-binding protein which promotes neuronal but not astrocyte differentiation (By similarity).	Secreted (By similarity).	Cytochrome b5 family, MAPR subfamily
CYP4F11	CYP4F11	57834	Q9HBI6	-3.18731	-2.98105	-4.36413	6.38148e-06	Cytochrome P450 4F11 (EC 1.14.14.1) (CYPIVF11)	aromatase activity; electron carrier activity; endoplasmic reticulum membrane; heme binding; inflammatory response; integral to membrane; microsome; oxidation-reduction process; xenobiotic metabolic process			Endoplasmic reticulum membrane; Single-pass membrane protein (By similarity). Microsome membrane; Single-pass membrane protein (By similarity).	Cytochrome P450 family
DCTN3	DCTN3 DCTN22	11258	O75935	-2.35019	-3.2778	-4.03328	2.75014e-05	Dynactin subunit 3 (Dynactin complex subunit 22 kDa subunit) (p22)	G2/M transition of mitotic cell cycle; cleavage furrow; condensed chromosome kinetochore; cytokinesis; cytosol; dynactin complex; microtubule organizing center; midbody; mitosis; perinuclear region of cytoplasm; protein binding; spindle; structural molecule activity	P40425	Together with dynein may be involved in spindle assembly and cytokinesis.	Cytoplasm. Cytoplasm, cytoskeleton, centrosome. Chromosome, centromere, kinetochore. Cytoplasm, cytoskeleton, spindle. Cleavage furrow. Midbody. Note=Localizes to punctate cytoplasmic structures and to the centrosome during interphase, and to kinetochores and to spindle poles throughout mitosis. Colocalizes with dynein to the cleavage furrow and to midbody of dividing cells.	Dynactin subunit 3 family
DDX59	DDX59 ZNHIT5	83479	Q5T1V6	-2.76365	-2.19461	-3.52903	0.000208543	Probable ATP-dependent RNA helicase DDX59 (EC 3.6.4.13) (DEAD box protein 59) (Zinc finger HIT domain-containing protein 5)	ATP binding; ATP-dependent helicase activity; RNA binding; intracellular; metal ion binding				DEAD box helicase family, DDX59 subfamily
DPCD	DPCD	25911	Q9BVM2	-2.93294	-3.0354	-4.22088	1.21676e-05	Protein DPCD	protein binding	Q9Y265; Q9Y230	May play a role in the formation or function of ciliated cells.		DPCD family
DSE	DSE SART2	29940	Q9UL01	-4.1499	-3.17066	-5.22252	8.82516e-08	Dermatan-sulfate epimerase (DS epimerase) (EC 5.1.3.19) (Chondroitin-glucuronate 5-epimerase) (Squamous cell carcinoma antigen recognized by T-cells 2) (SART-2)	Golgi apparatus; chondroitin-glucuronate 5-epimerase activity; dermatan sulfate biosynthetic process; endoplasmic reticulum; integral to membrane		Converts D-glucuronic acid to L-iduronic acid (IdoUA) residues.	Membrane; Multi-pass membrane protein (Potential).	Dermatan-sulfate isomerase family
EIF3J	EIF3J EIF3S1 PRO0391	8669	O75822	-2.15183	-4.74801	-5.21287	9.29702e-08	Eukaryotic translation initiation factor 3 subunit J (eIF3j) (Eukaryotic translation initiation factor 3 subunit 1) (eIF-3-alpha) (eIF3 p35)	cytosol; eukaryotic translation initiation factor 3 complex; protein binding; translation initiation factor activity	P55884	Component of the eukaryotic translation initiation factor 3 (eIF-3) complex, which is required for several steps in the initiation of protein synthesis. The eIF-3 complex associates with the 40S ribosome and facilitates the recruitment of eIF-1, eIF-1A, eIF-2:GTP:methionyl-tRNAi and eIF-5 to form the 43S preinitiation complex (43S PIC). The eIF-3 complex stimulates mRNA recruitment to the 43S PIC…	Cytoplasm (Probable).	EIF-3 subunit J family
ELOVL5	ELOVL5 ELOVL2 PRO0530	60481	Q9NYP7	-3.19724	-4.59139	-5.59493	1.10356e-08	Elongation of very long chain fatty acids protein 5 (EC 2.3.1.n8) (3-keto acyl-CoA synthase ELOVL5) (Fatty acid elongase 1) (hELO1)	endoplasmic reticulum membrane; fatty acid elongase activity; fatty acid elongation, monounsaturated fatty acid; fatty acid elongation, polyunsaturated fatty acid; integral to membrane; long-chain fatty-acyl-CoA biosynthetic process; protein binding; triglyceride biosynthetic process; very long-chain fatty acid biosynthetic process		Condensing enzyme that catalyzes the synthesis of monounsaturated and of polyunsaturated very long chain fatty acids Acts specifically toward polyunsaturated acyl-CoA with the higher activity toward C18:3(n-6) acyl-CoA.	Endoplasmic reticulum membrane; Multi-pass membrane protein.	ELO family
EPDR1	EPDR1 MERP1 UCC1	54749	Q9UM22	-3.29448	-2.21823	-3.97167	3.56856e-05	Mammalian ependymin-related protein 1 (MERP-1) (Upregulated in colorectal cancer gene 1 protein)	calcium ion binding; cell-matrix adhesion; extracellular region			Secreted.	Ependymin family
EXDL1	EXD1 EXDL1	161829	Q8NHP7	-4.69958	-3.67183	-5.96392	1.23126e-09	Exonuclease 3'-5' domain-containing protein 1 (Exonuclease 3'-5' domain-like-containing protein 1)	3'-5' exonuclease activity; intracellular; nucleic acid binding; nucleobase, nucleoside, nucleotide and nucleic acid metabolic process				EXD1 family
EXTL3	EXTL3 EXTL1L EXTR1 KIAA0519	2137	O43909	-2.2931	-3.91766	-4.53942	2.82045e-06	Exostosin-like 3 (EC 2.4.1.223) (EXT-related protein 1) (Glucuronyl-galactosyl-proteoglycan 4-alpha-N-acetylglucosaminyltransferase) (Hereditary multiple exostoses gene isolog) (Multiple exostosis-like protein 3) (Putative tumor suppressor protein EXTL3)	glucuronyl-galactosyl-proteoglycan 4-alpha-N-acetylglucosaminyltransferase activity; integral to membrane; intrinsic to endoplasmic reticulum membrane; metal ion binding; protein binding	P46108; P06241; P62993; P27986; P19174; P12931	Probable glycosyltransferase (By similarity).	Endoplasmic reticulum membrane; Single-pass type II membrane protein.	Glycosyltransferase 47 family
FABP5L3	FABP5P3 FABP5L3	220832	A8MUU1	-3.44523	-2.78835	-4.43221	4.66357e-06	Putative fatty acid-binding protein 5-like protein 3 (Fatty acid-binding protein 5 pseudogene 3)	lipid binding; transporter activity		High specificity for fatty acids (By similarity).		Calycin superfamily, Fatty-acid binding protein (FABP) family
FAM129B	FAM129B C9orf88	64855	Q96TA1	-4.79095	-2.262	-5.2981	5.8507e-08	Niban-like protein 1 (Meg-3) (Protein FAM129B)	protein binding	Q8R1F1			Niban family
FAM154A	FAM154A C9orf138	158297	Q8IYX7	-4.38763	-2.55846	-5.07908	1.89631e-07	Protein FAM154A					FAM154 family
FAM171B	FAM171B KIAA1946 NPD019	165215	Q6P995	-2.25206	-2.36456	-3.26541	0.000546522	Protein FAM171B	DNA binding; integral to membrane			Membrane; Single-pass type I membrane protein (Potential).	FAM171 family
FAM47B	FAM47B	170062	Q8NA70	-2.28973	-2.83424	-3.6436	0.000134427	Protein FAM47B					FAM47 family
FAM65A	FAM65A KIAA1930	79567	Q6ZS17	-2.29994	-2.98706	-3.76991	8.16525e-05	Protein FAM65A	binding; cytoplasm			Cytoplasm (By similarity). Note=Localizes to the podocyte major processes and cell body (By similarity).	FAM65 family
FLJ45139		400867	Q6ZSX8	-2.71791	-4.41889	-5.18783	1.06378e-07	cDNA FLJ45139 fis, clone BRAWH3039623
FOXRED2	FOXRED2 ERFAD	80020	Q8IWF2	-5.00665	-4.66307	-6.84185	3.90897e-12	FAD-dependent oxidoreductase domain-containing protein 2 (Endoplasmic reticulum flavoprotein associated with degradation)	ER-associated protein catabolic process; endoplasmic reticulum lumen; flavin adenine dinucleotide binding; oxidation-reduction process; oxidoreductase activity; protein binding		Probable flavoprotein which may function in endoplasmic reticulum associated degradation (ERAD). May bind non-native proteins in the endoplasmic reticulum and target them to the ubiquitination machinery for subsequent degradation.	Endoplasmic reticulum lumen.	FOXRED2 family
FRMPD2	FRMPD2 PDZD5C PDZK4 PDZK5C	143162	Q68DX3	-2.55724	-2.16295	-3.3493	0.000405083	FERM and PDZ domain-containing protein 2 (PDZ domain-containing protein 4) (PDZ domain-containing protein 5C)	1-phosphatidylinositol binding; basolateral plasma membrane; cytoplasm; cytoskeleton; protein binding; tight junction; tight junction assembly		May play a role in the regulation of tight junction formation. Binds phosphatidylinositol 3,4-bisphosphate (PtdIns(3,4)P2).	Cytoplasm (Potential). Basolateral cell membrane. Cell junction, tight junction. Note=Colocalizes with CTNNB1, CDH1 and PKP4 at the basolateral membrane. Colocalizes with TJP1 at tight junctions. Its recruitment to cell-cell contacts requires CDH1.
FTHL17	FTHL17	53940	Q9BXU8	-2.78404	-2.3174	-3.62232	0.000145985	Ferritin heavy polypeptide-like 17 (Cancer/testis antigen 38) (CT38)	cellular iron ion homeostasis; ferric iron binding; iron ion transport; oxidation-reduction process; oxidoreductase activity				Ferritin family
GABARAPL1	GABARAPL1 GEC1	23710	Q9H0R8	-2.54141	-3.41126	-4.25388	1.0505e-05	Gamma-aminobutyric acid receptor-associated protein-like 1 (Early estrogen-regulated protein) (GABA(A) receptor-associated protein-like 1) (Glandular epithelial cell protein 1) (GEC-1)	GABA receptor binding; Golgi apparatus; autophagic vacuole; beta-tubulin binding; endoplasmic reticulum; membrane; microtubule	Q9P2R3; Q9H0Y0; Q9BSB4; O75143; Q676U5; Q2TAZ0; Q9NT62; Q9Y4P1; Q9H1Y0; O95352; Q14677; Q8WXU2; Q96RU3; Q8TF40; Q9BQS8; O75323; P40939; P55084; O00410; Q86V97; Q8WVZ9; Q14596; Q8NI08; P46934; Q8TD19; P18708; Q92636; P41145; Q8WUM4; P10644; Q9Y3P9; Q9NS23; Q8WWW0; Q5XPI4; Q14151; Q15459; Q13501; O95210; Q13188; Q13043; Q8TC07; Q9UPU7; O15040; Q9GZZ9; O75385; Q8IYT8	Increases cell-surface expression of kappa-type opioid receptor through facilitating anterograde intracellular trafficking of the receptor.	Cytoplasm, cytoskeleton. Membrane (By similarity). Endoplasmic reticulum (By similarity). Golgi apparatus (By similarity).	MAP1 LC3 family
GDAP2	GDAP2	54834	Q9NXN4	-5.84887	-2.72388	-6.45204	5.51782e-11	Ganglioside-induced differentiation-associated protein 2					GDAP2 family
GFOD2	GFOD2 UNQ9430/PRO34691	81577	Q3B7J2	-2.22337	-2.29336	-3.1942	0.000701103	Glucose-fructose oxidoreductase domain-containing protein 2 (EC 1.-.-.-)	binding; oxidation-reduction process; oxidoreductase activity; proteinaceous extracellular matrix		Promotes matrix assembly (By similarity).	Secreted, extracellular space, extracellular matrix (By similarity).	Gfo/idh/mocA family
GKN2	GKN2 BLOT GDDR TFIZ1 UNQ465/PRO813	200504	Q86XP6	-4.72772	-2.78565	-5.48737	2.03985e-08	Gastrokine-2 (Blottin) (Down-regulated in gastric cancer) (Trefoil factor interactions(z) 1)	extracellular region			Secreted.
GLRA3	GLRA3	8001	O75311	-3.01046	-2.15239	-3.70076	0.000107476	Glycine receptor subunit alpha-3	cell junction; chloride channel complex; extracellular-glycine-gated chloride channel activity; glycine binding; integral to plasma membrane; postsynaptic membrane; receptor activity; synaptic transmission; transmitter-gated ion channel activity		The glycine receptor is a neurotransmitter-gated ion channel. Binding of glycine to its receptor increases the chloride conductance and thus produces hyperpolarization (inhibition of neuronal firing).	Cell junction, synapse, postsynaptic cell membrane; Multi-pass membrane protein. Cell membrane; Multi-pass membrane protein.	Ligand-gated ion channel (TC 1.A.9) family, Glycine receptor (TC 1.A.9.3) subfamily, GLRA3 sub-subfamily
GOLGA1	GOLGA1	2800	Q92805	-4.58048	-2.13211	-5.05239	2.18154e-07	Golgin subfamily A member 1 (Golgin-97)	Golgi cisterna membrane		Probably involved in maintaining Golgi structure.	Golgi apparatus, Golgi stack membrane; Peripheral membrane protein.
GOLPH3L	GOLPH3L GPP34R	55204	Q9H4A5	-2.31733	-3.13618	-3.89944	4.82078e-05	Golgi phosphoprotein 3-like (GPP34-related protein)	Golgi cisterna membrane			Cytoplasm (By similarity). Golgi apparatus, Golgi stack membrane; Peripheral membrane protein (By similarity).	GOLPH3/VPS74 family
GPHA2	GPHA2 GPA2 ZSIG51	170589	Q96T91	-2.26243	-4.60124	-5.12738	1.46903e-07	Glycoprotein hormone alpha-2 (Putative secreted protein Zsig51) (Thyrostimulin subunit alpha)	extracellular region; hormone activity		Stimulates the thyroid. Binds and activates THSR, leads to increased cAMP production.	Secreted.	Glycoprotein hormones subunit alpha family
GRAP2	GRAP2 GADS GRB2L GRID	9402	O75791	-4.14959	-2.6093	-4.90179	4.74842e-07	GRB2-related adapter protein 2 (Adapter protein GRID) (GRB-2-like protein) (GRB2L) (GRBLG) (GRBX) (Grf40 adapter protein) (Grf-40) (Growth factor receptor-binding protein) (Hematopoietic cell-associated adapter protein GrpL) (P38) (Protein GADS) (SH3-SH2-SH3 adapter Mona)	Ras protein signal transduction; SH3/SH2 adaptor activity; T cell costimulation; T cell receptor signaling pathway; cell-cell signaling; cytosol		Interacts with SLP-76 to regulate NF-AT activation. Binds to tyrosine-phosphorylated shc.		GRB2/sem-5/DRK family
GRIK3	GRIK3 GLUR7	2899	Q13003	-5.09494	-5.00851	-7.14448	4.51693e-13	Glutamate receptor, ionotropic kainate 3 (Excitatory amino acid receptor 5) (EAA5) (Glutamate receptor 7) (GluR-7) (GluR7)	G-protein-coupled receptor binding; adenylate cyclase inhibiting metabotropic glutamate receptor activity; cell junction; dendrite cytoplasm; extracellular-glutamate-gated ion channel activity; integral to plasma membrane; kainate selective glutamate receptor activity; negative regulation of synaptic transmission, glutamatergic; perikaryon; postsynaptic membrane; regulation of membrane potential;…		Receptor for glutamate. L-glutamate acts as an excitatory neurotransmitter at many synapses in the central nervous system. The postsynaptic actions of Glu are mediated by a variety of receptors that are named according to their selective agonists. This receptor binds domoate > kainate >> L-glutamate = quisqualate >> AMPA = NMDA.	Cell membrane; Multi-pass membrane protein. Cell junction, synapse, postsynaptic cell membrane; Multi-pass membrane protein.	Glutamate-gated ion channel (TC 1.A.10.1) family, GRIK3 subfamily
GRWD1	GRWD1 GRWD KIAA1942 WDR28	83743	Q9BQ67	-2.27878	-4.19045	-4.76998	9.21227e-07	Glutamate-rich WD repeat-containing protein 1	nucleolus			Nucleus, nucleolus.
GSPT2	GSPT2 ERF3B	23708	Q8IYD1	-3.43986	-2.80591	-4.43912	4.51642e-06	Eukaryotic peptide chain release factor GTP-binding subunit ERF3B (Eukaryotic peptide chain release factor subunit 3b) (eRF3b) (G1 to S phase transition protein 2 homolog)	GTP binding; GTPase activity; cell cycle; cytoplasm; protein binding; translational termination		Involved in translation termination in response to the termination codons UAA, UAG and UGA. May play a role as a potent stimulator of the release factor activity of ETF1. Exhibits GTPase activity, which is ribosome- and ETF1-dependent. May play a role in cell cycle progression.	Cytoplasm (Probable).	GTP-binding elongation factor family, ERF3 subfamily
GSX2	GSX2 GSH2	170825	Q9BZM3	-2.51559	-4.63644	-5.27492	6.64066e-08	GS homeobox 2 (Homeobox protein GSH-2)	nucleus; protein binding; regulation of transcription, DNA-dependent; sequence-specific DNA binding; sequence-specific DNA binding transcription factor activity; transcription regulator activity	P00519	Probable transcription factor that binds to the DNA sequence 5'-CNAATTAG-3' (By similarity).	Nucleus (By similarity).	Antp homeobox family
H1FX	H1FX	8971	Q92522	-4.32646	-2.69535	-5.09736	1.72208e-07	Histone H1x	DNA binding; nucleosome; nucleosome assembly; nucleus		Histones H1 are necessary for the condensation of nucleosome chains into higher order structures.	Nucleus. Chromosome.	Histone H1/H5 family
HACL1	HACL1 HPCL HPCL2 PHYH2 HSPC279	26061	Q9UJ83	-3.87265	-4.03667	-5.59394	1.10988e-08	2-hydroxyacyl-CoA lyase 1 (EC 4.1.-.-) (2-hydroxyphytanoyl-CoA lyase) (2-HPCL) (Phytanoyl-CoA 2-hydroxylase 2)	carbon-carbon lyase activity; fatty acid alpha-oxidation; identical protein binding; magnesium ion binding; peroxisomal matrix; thiamine pyrophosphate binding	Itself	Catalyzes a carbon-carbon cleavage reaction; cleaves a 2-hydroxy-3-methylacyl-CoA into formyl-CoA and a 2-methyl-branched fatty aldehyde.	Peroxisome.	TPP enzyme family
HDDC3	HDDC3 MESH1	374659	Q8N4P3	-2.47418	-3.36877	-4.17974	1.45923e-05	Guanosine-3',5'-bis(diphosphate) 3'-pyrophosphohydrolase MESH1 (EC 3.1.7.2) (HD domain-containing protein 3) (Metazoan SpoT homolog 1) (MESH1) (Penta-phosphate guanosine-3'-pyrophosphohydrolase) ((ppGpp)ase)	guanosine-3',5'-bis(diphosphate) 3'-diphosphatase activity; metal ion binding		ppGpp hydrolyzing enzyme involved in starvation response.		MESH1 family
HEATR2	HEATR2	54919	Q86Y56	-2.32669	-4.5378	-5.09953	1.70251e-07	HEAT repeat-containing protein 2	protein binding	Q9HAW0; P49662; O76071; Q9Y2Q3; Q13418; P43360; Q9Y5V3; O00264; Q9Y5J5; Q96T60; O75365; Q15714
HLA-DPB1	HLA-DPB1 HLA-DP1B	3115	P04440	-4.04517	-3.01672	-5.04619	2.25357e-07	HLA class II histocompatibility antigen, DP beta 1 chain (HLA class II histocompatibility antigen, DP(W4) beta chain) (MHC class II antigen DPB1)	Golgi apparatus; MHC class II protein complex; T cell costimulation; T cell receptor signaling pathway; antigen processing and presentation of peptide or polysaccharide antigen via MHC class II; endoplasmic reticulum membrane; endosome membrane; integral to membrane; interferon-gamma-mediated signaling pathway; lysosomal membrane		Binds peptides derived from antigens that access the endocytic route of antigen presenting cells (APC) and presents them on the cell surface for recognition by the CD4 T-cells. The peptide binding cleft accomodates peptides of 10-30 residues. The peptides presented by MHC class II molecules are generated mostly by degradation of proteins that access the endocytic route, where they are processed b…	Cell membrane; Single-pass type I membrane protein. Endoplasmic reticulum membrane; Single-pass type I membrane protein. Golgi apparatus, trans-Golgi network membrane; Single-pass type I membrane protein. Endosome membrane; Single-pass type I membrane protein. Lysosome membrane; Single-pass type I membrane protein. Note=The MHC class II complex transits through a number of intracellular compartme…	MHC class II family
HRBL	AGFG2 HRBL RABR	3268	O95081	-3.24841	-2.56894	-4.14145	1.72558e-05	Arf-GAP domain and FG repeats-containing protein 2 (HIV-1 Rev-binding protein-like protein) (Rev/Rex activation domain-binding protein related) (RAB-R)	ARF GTPase activator activity; regulation of ARF GTPase activity; zinc ion binding
HSD3B7	HSD3B7	80270	Q9H2F3	-3.57672	-2.19958	-4.19894	1.34084e-05	3 beta-hydroxysteroid dehydrogenase type 7 (3 beta-hydroxysteroid dehydrogenase type VII) (3-beta-HSD VII) (3-beta-hydroxy-Delta(5)-C27 steroid oxidoreductase) (C(27) 3-beta-HSD) (EC 1.1.1.-) (Cholest-5-ene-3-beta,7-alpha-diol 3-beta-dehydrogenase) (EC 1.1.1.181)	3-beta-hydroxy-delta5-steroid dehydrogenase activity; bile acid biosynthetic process; binding; cholest-5-ene-3-beta,7-alpha-diol 3-beta-dehydrogenase activity; endoplasmic reticulum membrane; integral to membrane; oxidation-reduction process		The 3-beta-HSD enzymatic system plays a crucial role in the biosynthesis of all classes of hormonal steroids. HSD VII is active against four 7-alpha-hydroxylated sterols. Does not metabolize several different C(19/21) steroids as substrates. Involved in bile acid synthesis.	Endoplasmic reticulum membrane; Multi-pass membrane protein.	3-beta-HSD family
HSN2	WNK1 HSN2 KDP KIAA0344 PRKWNK1	378465	Q9H4A3	-2.29464	-2.55867	-3.43688	0.000294226	Serine/threonine-protein kinase WNK1 (EC 2.7.11.1) (Erythrocyte 65 kDa protein) (p65) (Kinase deficient protein) (Protein kinase lysine-deficient 1) (Protein kinase with no lysine 1) (hWNK1)	ATP binding; cytoplasm; intracellular protein kinase cascade; ion transport; neuron development; protein binding; protein kinase inhibitor activity; protein phosphorylation; protein serine/threonine kinase activity	P29101	Controls sodium and chloride ion transport by inhibiting the activity of WNK4, potentially by either phosphorylating the kinase or via an interaction between WNK4 and the autoinhibitory domain of WNK1. WNK4 regulates the activity of the thiazide-sensitive Na-Cl cotransporter, SLC12A3, by phosphorylation. WNK1 may also play a role in actin cytoskeletal reorganization.	Cytoplasm.	Protein kinase superfamily, Ser/Thr protein kinase family, WNK subfamily
HSPBP1	HSPBP1 HSPBP PP1845	23640	Q9NZL4	-2.37939	-2.53639	-3.47775	0.000252816	Hsp70-binding protein 1 (HspBP1) (Heat shock protein-binding protein 1) (Hsp70-binding protein 2) (HspBP2) (Hsp70-interacting protein 1) (Hsp70-interacting protein 2)	enzyme inhibitor activity; positive regulation of proteasomal ubiquitin-dependent protein catabolic process; positive regulation of protein ubiquitination; protein binding; protein folding	P11142	Inhibits HSPA1A chaperone activity by changing the conformation of the ATP-binding domain of HSPA1A and interfering with ATP binding. Interferes with ubiquitination mediated by STUB1 and inhibits chaperone-assisted degradation of immature CFTR.
IFT172	IFT172 KIAA1179	26160	Q9UG01	-3.11618	-2.68346	-4.11237	1.9581e-05	Intraflagellar transport protein 172 homolog	binding; cilium; cilium assembly		Required for the maintenance and formation of cilia. Plays an indirect role in hedgehog (Hh) signaling, cilia being required for all activity of the hedgehog pathway (By similarity).	Cell projection, cilium (By similarity).	IFT172 family
IGFL1	IGFL1 UNQ644/PRO1274	374918	Q6UW32	-3.47212	-2.15941	-4.08884	2.16764e-05	Insulin growth factor-like family member 1	extracellular space		Probable ligand of the IGFLR1 cell membrane receptor.	Secreted.	IGFL family
IK	KATNAL2	3550	Q8IYT4	-3.54488	-2.89958	-4.57971	2.32809e-06	Katanin p60 ATPase-containing subunit A-like 2 (Katanin p60 subunit A-like 2) (EC 3.6.4.3) (p60 katanin-like 2)	ATP binding; cytoplasm; microtubule; microtubule-severing ATPase activity		Severs microtubules in vitro in an ATP-dependent manner. This activity may promote rapid reorganization of cellular microtubule arrays (By similarity).	Cytoplasm, cytoskeleton (By similarity).	AAA ATPase family
IL17B	IL17B IL20 NIRF ZCYTO7 UNQ516/PRO1031	27190	Q9UHF5	-2.52006	-2.51643	-3.56134	0.000184485	Interleukin-17B (IL-17B) (Cytokine Zcyto7) (Interleukin-20) (IL-20) (Neuronal interleukin-17-related factor)	cell-cell signaling; cytokine activity; extracellular space; immune response; inflammatory response; signal transducer activity		Stimulates the release of tumor necrosis factor alpha and IL-1-beta from the monocytic cell line THP-1.	Secreted.	IL-17 family
INTS2	INTS2 KIAA1287	57508	Q9H0H0	-5.23592	-2.43312	-5.77364	3.87889e-09	Integrator complex subunit 2 (Int2)	integral to membrane; integrator complex; nuclear membrane; protein binding; snRNA processing		Component of the Integrator complex, a complex involved in the small nuclear RNAs (snRNA) U1 and U2 transcription and in their 3'-box-dependent processing. The Integrator complex is associated with the C-terminal domain (CTD) of RNA polymerase II largest subunit (POLR2A) and is recruited to the U1 and U2 snRNAs genes.	Nucleus membrane; Single-pass membrane protein (Potential).	Integrator subunit 2 family
ITPKC	ITPKC IP3KC	80271	Q96DU7	-3.23551	-3.06228	-4.45489	4.19675e-06	Inositol-trisphosphate 3-kinase C (EC 2.7.1.127) (Inositol 1,4,5-trisphosphate 3-kinase C) (IP3 3-kinase C) (IP3K C) (InsP 3-kinase C)	ATP binding; calmodulin binding; cytoplasm; inositol trisphosphate 3-kinase activity; nucleus		Can phosphorylate inositol 2,4,5-triphosphate to inositol 2,4,5,6-tetraphosphate (By similarity).	Nucleus. Cytoplasm. Note=Shuttles actively between nucleus and cytoplasm with both nuclear import and nuclear export activity.	Inositol phosphokinase (IPK) family
JDP2	JDP2	122953	Q8WYK2	-3.33756	-2.32967	-4.07022	2.34848e-05	Jun dimerization protein 2	nucleus; sequence-specific DNA binding	P06401	Component of the AP-1 transcription factor that represses transactivation mediated by the Jun family of proteins. Involved in a variety of transcriptional responses associated with AP-1 such as UV-induced apoptosis, cell differentiation, tumorigenesis and antitumogeneris. Can also function as a repressor by recruiting histone deacetylase 3/HDAC3 to the promoter region of JUN. May control transcri…	Nucleus (Probable).	BZIP family, ATF subfamily
JMJD8	JMJD8 C16orf20 PP14397	339123	Q96S16	-2.44963	-3.44105	-4.22392	1.20044e-05	JmjC domain-containing protein 8 (Jumonji domain-containing protein 8)
KATNAL2	KATNAL2	83473	Q8IYT4	-4.03642	-4.04881	-5.71713	5.41699e-09	Katanin p60 ATPase-containing subunit A-like 2 (Katanin p60 subunit A-like 2) (EC 3.6.4.3) (p60 katanin-like 2)	ATP binding; cytoplasm; microtubule; microtubule-severing ATPase activity		Severs microtubules in vitro in an ATP-dependent manner. This activity may promote rapid reorganization of cellular microtubule arrays (By similarity).	Cytoplasm, cytoskeleton (By similarity).	AAA ATPase family
KCNC2	KCNC2	3747	Q96PR1	-4.61093	-3.98945	-6.09724	5.39565e-10	Potassium voltage-gated channel subfamily C member 2 (Voltage-gated potassium channel Kv3.2)	energy reserve metabolic process; regulation of insulin secretion; voltage-gated potassium channel activity; voltage-gated potassium channel complex		Mediates the voltage-dependent potassium ion permeability of excitable membranes. Assuming opened or closed conformations in response to the voltage difference across the membrane, the protein forms a potassium-selective channel through which potassium ions may pass in accordance with their electrochemical gradient. Channel properties are modulated by subunit assembly (By similarity).	Membrane; Multi-pass membrane protein.	Potassium channel family, C (Shaw) (TC 1.A.1.2) subfamily, Kv3.2/KCNC2 sub-subfamily
KCNK7	KCNK7	10089	Q9Y2U2	-5.09814	-4.45652	-6.77138	6.37801e-12	Potassium channel subfamily K member 7	integral to membrane; potassium channel activity; voltage-gated ion channel activity		Probable potassium channel subunit. No channel activity observed in vitro as protein remains in the endoplasmic reticulum. May need to associate with an as yet unknown partner in order to reach the plasma membrane.	Membrane; Multi-pass membrane protein (Potential).	Two pore domain potassium channel (TC 1.A.1.8) family
KCNK9	KCNK9 TASK3	51305	Q9NPC2	-5.02098	-2.73221	-5.71623	5.44582e-09	Potassium channel subfamily K member 9 (Acid-sensitive potassium channel protein TASK-3) (TWIK-related acid-sensitive K(+) channel 3) (Two pore potassium channel KT3.2) (Two pore K(+) channel KT3.2)	integral to membrane; membrane fraction; potassium channel activity; voltage-gated ion channel activity		pH-dependent, voltage-insensitive, background potassium channel protein.	Membrane; Multi-pass membrane protein (Potential).	Two pore domain potassium channel (TC 1.A.1.8) family
KCNQ4	KCNQ4	9132	P56696	-5.02154	-2.65272	-5.67916	6.76806e-09	Potassium voltage-gated channel subfamily KQT member 4 (KQT-like 4) (Potassium channel subunit alpha KvLQT4) (Voltage-gated potassium channel subunit Kv7.4)	basal plasma membrane; sensory perception of sound; voltage-gated potassium channel complex		Probably important in the regulation of neuronal excitability. May underlie a potassium current involved in regulating the excitability of sensory cells of the cochlea. KCNQ4 channels are blocked by linopirdin, XE991 and bepridil, whereas clofilium is without significant effect. Muscarinic agonist oxotremorine-M strongly suppress KCNQ4 current in CHO cells in which cloned KCNQ4 channels were coex…	Basal cell membrane; Multi-pass membrane protein. Note=Situated at the basal membrane of cochlear outer hair cells (By similarity).	Potassium channel family, KQT (TC 1.A.1.15) subfamily, Kv7.4/KCNQ4 sub-subfamily
KCTD14	KCTD14	65987	Q9BQ13	-3.28179	-6.37595	-7.17097	3.72343e-13	BTB/POZ domain-containing protein KCTD14	voltage-gated potassium channel activity; voltage-gated potassium channel complex
KHK	KHK	3795	P50053	-2.21862	-3.14595	-3.84958	5.91594e-05	Ketohexokinase (EC 2.7.1.3) (Hepatic fructokinase)	ATP binding; cytosol; fructose catabolic process; ketohexokinase activity; protein binding	P49407; O95400; Q96JB5; O75618; P31025; P61626; Q15287; P14678			Carbohydrate kinase pfkB family
KIAA1737	KIAA1737	85457	Q9C0C6	-3.38746	-2.79778	-4.39346	5.57811e-06	Uncharacterized protein KIAA1737
KLHL26	KLHL26	55295	Q53HC5	-3.57595	-2.76921	-4.52283	3.05097e-06	Kelch-like protein 26
LCE1C	LCE1C LEP3	353133	Q5T751	-2.25223	-2.5819	-3.42619	0.000306056	Late cornified envelope protein 1C (Late envelope protein 3)	keratinization		Precursors of the cornified envelope of the stratum corneum.		LCE family
LCE1E	LCE1E LEP5	353135	Q5T753	-4.79348	-3.38103	-5.8659	2.23345e-09	Late cornified envelope protein 1E (Late envelope protein 5)	keratinization		Precursors of the cornified envelope of the stratum corneum.		LCE family
LSM2	LSM2 C6orf28 G7B	57819	Q9Y333	-3.93749	-2.8094	-4.837	6.59076e-07	U6 snRNA-associated Sm-like protein LSm2 (Protein G7b) (Small nuclear ribonuclear protein D homolog) (snRNP core Sm-like protein Sm-x5)	U6 snRNA binding; catalytic step 2 spliceosome; cytosol; exonucleolytic nuclear-transcribed mRNA catabolic process involved in deadenylation-dependent decay; nuclear mRNA splicing, via spliceosome; nucleoplasm	P31689; Q01780; O15116; P62310; Q9UK45; O95777; P62316; P62304; Q9H9D4	Binds specifically to the 3'-terminal U-tract of U6 snRNA. May be involved in pre-mRNA splicing.	Nucleus (Potential).	SnRNP Sm proteins family
LY6H	LY6H	4062	O94772	-2.47751	-2.88607	-3.80361	7.1302e-05	Lymphocyte antigen 6H (Ly-6H)	anchored to membrane; nervous system development; organ morphogenesis; plasma membrane			Cell membrane; Lipid-anchor, GPI-anchor (By similarity).
LY6K	LY6K CO16	54742	Q17RY6	-5.23928	-3.21014	-6.14452	4.01038e-10	Lymphocyte antigen 6K (Ly-6K)	anchored to membrane; cytoplasm; extracellular region; nucleolus; plasma membrane		May play a role in cell growth.	Secreted. Cytoplasm. Cell membrane; Lipid-anchor, GPI-anchor (Potential).
MAF1	MAF1	84232	Q9H063	-2.726	-2.59494	-3.76361	8.37378e-05	Repressor of RNA polymerase III transcription MAF1 homolog	cytoplasm; negative regulation of transcription from RNA polymerase III promoter; nucleus; transcription regulator activity; transcription, DNA-dependent		Element of the mTORC1 signaling pathway that acts as a mediator of diverse signals and that represses RNA polymerase III transcription. Inhibits the de novo assembly of TFIIIB onto DNA.	Nucleus. Cytoplasm.	MAF1 family
MAGEB6	MAGEB6	158809	Q8N7X4	-2.42164	-4.603	-5.20115	9.90297e-08	Melanoma-associated antigen B6 (Cancer/testis antigen 3.4) (CT3.4) (MAGE-B6 antigen)
MAGI3	MAGI3 KIAA1634	260425	Q5TCQ9	-4.43239	-3.01454	-5.36036	4.15273e-08	Membrane-associated guanylate kinase, WW and PDZ domain-containing protein 3 (Membrane-associated guanylate kinase inverted 3) (MAGI-3)	ATP binding; apoptosis; guanylate kinase activity; interspecies interaction between organisms; intracellular signal transduction; nucleus; protein binding; tight junction	P08588	Acts as a scaffolding protein at cell-cell junctions, thereby regulating various cellular and signaling processes. Cooperates with PTEN to modulate the kinase activity of AKT1. Its interaction with PTPRB and tyrosine phosphorylated proteins suggests that it may link receptor tyrosine phosphatase with its substrates at the plasma membrane. In polarized epithelial cells, involved in efficient traff…	Cell membrane; Peripheral membrane protein. Cell junction, tight junction. Nucleus (By similarity). Note=Concentrates in specific sites at the plasma membrane and in the nucleus. In epithelial cells, it localizes at tight junctions (By similarity).	MAGUK family
MAK10	NAA35 EGAP MAK10	60560	Q5VZE5	-3.00068	-2.22714	-3.73687	9.31624e-05	N-alpha-acetyltransferase 35, NatC auxiliary subunit (Embryonic growth-associated protein homolog) (Protein MAK10 homolog)	cytoplasm; nucleus; plasma membrane; smooth muscle cell proliferation		Regulates proliferation of smooth muscle cells (By similarity). Component of the N-terminal acetyltransferase C (NatC) complex which may catalyze acetylation of N-terminal methionine residues.	Cytoplasm.	MAK10 family
MAP3K7IP2	TAB2 KIAA0733 MAP3K7IP2	23118	Q9NYJ8	-3.35217	-2.16034	-3.98799	3.33176e-05	TGF-beta-activated kinase 1 and MAP3K7-binding protein 2 (Mitogen-activated protein kinase kinase kinase 7-interacting protein 2) (TAK1-binding protein 2) (TAB-2) (TGF-beta-activated kinase 1-binding protein 2)	I-kappaB kinase/NF-kappaB cascade; JNK cascade; K63-linked polyubiquitin binding; MyD88-dependent toll-like receptor signaling pathway; MyD88-independent toll-like receptor signaling pathway; T cell receptor signaling pathway; Toll signaling pathway; activation of MAPK activity; cytosol; endosome membrane; heart development; innate immune response; plasma membrane; positive regulation of I-kappaB…	O43318; Q62073	Adapter linking MAP3K7/TAK1 and TRAF6. Promotes MAP3K7 activation in the IL1 signaling pathway. The binding of 'Lys-63'-linked polyubiquitin chains to TAB2 promotes autophosphorylation of MAP3K7 at 'Thr-187'. Involved in heart development.	Membrane; Peripheral membrane protein. Cytoplasm, cytosol. Note=Following IL1 stimulation, translocation occurs from the membrane to cytosol.
MB	MB	4151	P02144	-3.99376	-2.14102	-4.53146	2.92892e-06	Myoglobin	heme binding; oxygen transporter activity		Serves as a reserve supply of oxygen and facilitates the movement of oxygen within muscles.		Globin family
MEX3A	MEX3A RKHD4	92312	A1L020	-4.22817	-3.34216	-5.38957	3.5313e-08	RNA-binding protein MEX3A (RING finger and KH domain-containing protein 4)	RNA binding; cytoplasmic mRNA processing body; nucleus; zinc ion binding		RNA binding protein, may be involved in post-transcriptional regulatory mechanisms.	Cytoplasm. Nucleus. Cytoplasm, P-body. Note=Predominantly expressed in the cytoplasm and shuttles between the cytoplasm and the nucleus through the CRM1 export pathway.
MFSD7	MFSD7 LP2561 UNQ385/PRO717	84179	Q6UXD7	-3.91348	-2.8506	-4.84162	6.43929e-07	Major facilitator superfamily domain-containing protein 7 (Myosin light polypeptide 5 regulatory protein) (MYL5)	integral to membrane; transmembrane transport			Membrane; Multi-pass membrane protein (Potential).	Major facilitator superfamily
MFSD9	MFSD9 PSEC0066	84804	Q8NBP5	-2.4189	-2.87889	-3.7602	8.48897e-05	Major facilitator superfamily domain-containing protein 9	integral to membrane; response to antibiotic; tetracycline:hydrogen antiporter activity			Membrane; Multi-pass membrane protein (Potential).	Major facilitator superfamily
MGC24975	PRR22	163154	Q8IZ63	-2.43312	-4.42831	-5.05272	2.17784e-07	Proline-rich protein 22
MICALL1	MICALL1 KIAA1668 MIRAB13	85377	Q8N3F8	-2.68348	-3.45242	-4.37267	6.13674e-06	MICAL-like protein 1 (Molecule interacting with Rab13) (MIRab13)	cytoplasm; cytoskeleton; protein binding; zinc ion binding		May be a cytoskeletal regulator.	Cytoplasm, cytoskeleton (By similarity).
MIER3	MIER3	166968	Q7Z3K6	-4.89998	-4.5779	-6.70575	1.00189e-11	Mesoderm induction early response protein 3 (Mi-er3)	DNA binding; nucleus; regulation of transcription, DNA-dependent; transcription, DNA-dependent		Transcriptional repressor (By similarity).	Nucleus (By similarity).
MOAP1	MOAP1 PNMA4	64112	Q96BY2	-3.62625	-2.39001	-4.34303	7.02664e-06	Modulator of apoptosis 1 (MAP-1) (MAP1) (Paraneoplastic antigen Ma4)	activation of caspase activity; apoptotic nuclear change; cytoplasm; protein homodimerization activity		Required for death receptor-dependent apoptosis. When associated with RASSF1, promotes BAX conformational change and translocation to mitochondrial membranes in response to TNF and TNFSF10 stimulation.		PNMA family
MOSC2	MOSC2	54996	Q969Z3	-2.69013	-4.69601	-5.41196	3.11696e-08	MOSC domain-containing protein 2, mitochondrial (EC 1.-.-.-)	mitochondrial outer membrane; molybdenum ion binding; oxidation-reduction process; oxidoreductase activity; pyridoxal phosphate binding		Catalytic component of the benzamidoxime prodrug-converting complex, a complex required to reduce N-hydroxylated structures, such as benzamidoxime prodrug. Benzamidoxime is an amidine prodrug produced by N-hydroxylation which is used to enhance bioavailability and increase intestinal absorption. It is then reduced into benzamidine, its active amidine, by the benzamidoxime prodrug-converting compl…	Mitochondrion outer membrane; Peripheral membrane protein. Peroxisome (By similarity).
MPHOSPH8	MPHOSPH8 MPP8	54737	Q99549	-5.61549	-2.40871	-6.11029	4.97247e-10	M-phase phosphoprotein 8 (Two hybrid-associated protein 3 with RanBPM) (Twa3)	cell cycle; chromatin; chromatin assembly or disassembly; chromatin binding; cytoplasm; nucleus			Nucleus.
MRPL48	MRPL48 CGI-118 HSPC290	51642	Q96GC5	-3.03359	-4.5675	-5.48313	2.08927e-08	39S ribosomal protein L48, mitochondrial (L48mt) (MRP-L48)	mitochondrion; ribosome; structural constituent of ribosome; translation			Mitochondrion (By similarity).
MSTO1	MSTO1 LST005 SLTP005	55154	Q9BUK6	-4.81626	-2.94184	-5.64365	8.32418e-09	Protein misato homolog 1	mitochondrial outer membrane; mitochondrion distribution; protein complex; protein polymerization		Involved in the regulation of mitochondrial distribution and morphology.	Mitochondrion outer membrane.	Misato family
MTMR3	MTMR3 KIAA0371 ZFYVE10	8897	Q13615	-5.00828	-2.50453	-5.5996	1.07424e-08	Myotubularin-related protein 3 (EC 3.1.3.48) (FYVE domain-containing dual specificity protein phosphatase 1) (FYVE-DSP1) (Zinc finger FYVE domain-containing protein 10)	cytoplasm; membrane; membrane fraction; nucleus; phosphatidylinositol dephosphorylation; phosphatidylinositol-3-phosphatase activity; protein serine/threonine phosphatase activity; protein tyrosine phosphatase activity; zinc ion binding		Phosphatase that acts on lipids with a phosphoinositol headgroup. Has phosphatase activity towards phosphatidylinositol-3-phosphate and phosphatidylinositol-3,5-bisphosphate. May also dephosphorylate proteins phosphorylated on Ser, Thr, and Tyr residues.	Cytoplasm. Membrane; Peripheral membrane protein.	Protein-tyrosine phosphatase family, Non-receptor class myotubularin subfamily
MTX1	MTX1 MTX MTXN	4580	Q13505	-4.79614	-2.26782	-5.30528	5.62498e-08	Metaxin-1 (Mitochondrial outer membrane import complex protein 1)	integral to membrane; mitochondrial outer membrane; protein binding; protein targeting to mitochondrion	Q9HC24	Involved in transport of proteins into the mitochondrion. Essential for embryonic development (By similarity).	Membrane; Single-pass type I membrane protein (Potential). Mitochondrion outer membrane (By similarity).	Metaxin family
MYST3	MYST3 MOZ RUNXBP2 ZNF220	7994	Q92794	-3.08556	-2.12534	-3.7467	8.95883e-05	Histone acetyltransferase MYST3 (MYST-3) (EC 2.3.1.48) (MOZ, YBF2/SAS3, SAS2 and TIP60 protein 3) (Monocytic leukemia zinc finger protein) (Runt-related transcription factor-binding protein 2) (Zinc finger protein 220)	DNA binding; MOZ/MORF histone acetyltransferase complex; histone H3 acetylation; histone acetyltransferase activity; myeloid cell differentiation; negative regulation of transcription, DNA-dependent; nucleosome; nucleosome assembly; positive regulation of transcription, DNA-dependent; transcription activator activity; transcription coactivator activity; transcription factor binding; transcription…	Q03164; P61964	Histone acetyltransferase that acetylates lysine residues in histone H3 and histone H4 (in vitro). Component of the MOZ/MORF complex which has a histone H3 acetyltransferase activity. May act as a transcriptional coactivator for RUNX1 and RUNX2.	Nucleus. Note=Partially concentrated in subnuclear foci distinct from PML bodies, and excluded from the nucleoli.	MYST (SAS/MOZ) family
NAGPA	NAGPA	51172	Q9UK23	-2.36	-2.21318	-3.23539	0.000607379	N-acetylglucosamine-1-phosphodiester alpha-N-acetylglucosaminidase (EC 3.1.4.45) (Mannose 6-phosphate-uncovering enzyme) (Phosphodiester alpha-GlcNAcase)	Golgi cisterna membrane; N-acetylglucosamine-1-phosphodiester alpha-N-acetylglucosaminidase activity; carbohydrate metabolic process; integral to membrane; lysosome organization; protein modification process; protein targeting to lysosome		Catalyzes the second step in the formation of the mannose 6-phosphate targeting signal on lysosomal enzyme oligosaccharides by removing GlcNAc residues from GlcNAc-alpha-P-mannose moieties, which are formed in the first step.	Golgi apparatus, Golgi stack membrane; Single-pass type I membrane protein. Note=Cis/medial Golgi.
NARG2	NARG2 BRCC1 UNQ3101/PRO10100	79664	Q659A1	-2.48061	-2.13068	-3.27004	0.000537653	NMDA receptor-regulated protein 2	nucleus			Nucleus (By similarity).
NBPF15	NBPF15	284565	Q8N660	-3.26922	-2.31538	-4.0061	3.08653e-05	Neuroblastoma breakpoint family member 15	cytoplasm			Cytoplasm (Probable).	NBPF family
NDUFS7	NDUFS7	374291	O75251	-3.17161	-2.17539	-3.84596	6.004e-05	NADH dehydrogenase [ubiquinone] iron-sulfur protein 7, mitochondrial (EC 1.6.5.3) (EC 1.6.99.3) (Complex I-20kD) (CI-20kD) (NADH-ubiquinone oxidoreductase 20 kDa subunit) (PSST subunit)	4 iron, 4 sulfur cluster binding; NADH dehydrogenase (ubiquinone) activity; metal ion binding; mitochondrial electron transport, NADH to ubiquinone; mitochondrial respiratory chain complex I; mitochondrial respiratory chain complex I assembly; protein binding; quinone binding; transport		Core subunit of the mitochondrial membrane respiratory chain NADH dehydrogenase (Complex I) that is believed to belong to the minimal assembly required for catalysis. Complex I functions in the transfer of electrons from NADH to the respiratory chain. The immediate electron acceptor for the enzyme is believed to be ubiquinone (By similarity).	Mitochondrion.	Complex I 20 kDa subunit family
NGRN	NGRN FI58G HT020	51335	Q9NPE2	-3.17471	-2.63573	-4.12624	1.8437e-05	Neugrin (Mesenchymal stem cell protein DSC92) (Neurite outgrowth-associated protein) (Spinal cord-derived protein FI58G)	extracellular region; neuron differentiation; nucleus		May be involved in neuronal differentiation.	Nucleus. Secreted (Potential).	Neugrin family
NLRP13	NLRP13 NALP13 NOD14	126204	Q86W25	-2.92734	-2.75012	-4.01653	2.95308e-05	NACHT, LRR and PYD domains-containing protein 13 (Nucleotide-binding oligomerization domain protein 14)	ATP binding		Involved in inflammation (Potential).		NLRP family
OPA3	OPA3	80207	Q9H6K4	-2.4597	-3.5997	-4.35981	6.50879e-06	Optic atrophy 3 protein	mitochondrion; response to stimulus; visual perception		May play some role in mitochondrial processes.	Mitochondrion (Probable).	OPA3 family
OR52E4	OR52E4	390081	Q8NGH9	-3.2071	-3.07239	-4.44129	4.4711e-06	Olfactory receptor 52E4 (Olfactory receptor OR11-55)	integral to membrane; olfactory receptor activity; plasma membrane; sensory perception of smell		Odorant receptor (Potential).	Cell membrane; Multi-pass membrane protein.	G-protein coupled receptor 1 family
OR8I2	OR8I2	120586	Q8N0Y5	-7.40995	-2.63402	-7.86419	1.85749e-15	Olfactory receptor 8I2 (Olfactory receptor OR11-170)	integral to membrane; olfactory receptor activity; plasma membrane; sensory perception of smell		Odorant receptor (Potential).	Cell membrane; Multi-pass membrane protein.	G-protein coupled receptor 1 family
OSTN	OSTN	344901	P61366	-3.29287	-3.38134	-4.71979	1.18043e-06	Osteocrin (Musclin)	cell differentiation; hormone activity; multicellular organismal development; ossification		Appears to modulate osteoblastic differentiation. Could also function as an autocrine and paracrine factor linked to glucose metabolism in skeletal muscle (By similarity).	Secreted.
OTUB1	OTUB1 OTB1 OTU1 HSPC263	55611	Q96FW1	-3.49941	-4.27831	-5.52719	1.627e-08	Ubiquitin thioesterase OTUB1 (EC 3.4.19.12) (Deubiquitinating enzyme OTUB1) (OTU domain-containing ubiquitin aldehyde-binding protein 1) (Otubain-1) (hOTU1) (Ubiquitin-specific-processing protease OTUB1)	NEDD8-specific protease activity; cytoplasm; omega peptidase activity; protein K48-linked deubiquitination; ubiquitin binding; ubiquitin-specific protease activity		Hydrolase that can remove conjugated ubiquitin from proteins and plays an important regulatory role at the level of protein turnover by preventing degradation. Regulator of T-cell anergy, a phenomenon that occurs when T-cells are rendered unresponsive to antigen rechallenge and no longer respond to their cognate antigen. Acts via its interaction with RNF128/GRAIL, a crucial inductor of CD4 T-cell…	Cytoplasm (By similarity).	Peptidase C65 family
OXR1	OXR1 Nbla00307	55074	Q8N573	-2.68665	-4.28105	-5.05425	2.1604e-07	Oxidation resistance protein 1	cell wall macromolecule catabolic process; mitochondrion; response to oxidative stress		May be involved in protection from oxidative damage.	Mitochondrion.	OXR1 family
PAPD5	PAPD5	64282	Q8NDF8	-3.23098	-2.93876	-4.36755	6.28227e-06	PAP-associated domain-containing protein 5 (EC 2.7.7.-) (Terminal uridylyltransferase 3) (TUTase 3) (Topoisomerase-related function protein 4-2) (TRF4-2)	DNA binding; DNA replication; DNA-directed DNA polymerase activity; cell division; cytoplasm; histone mRNA catabolic process; mitosis; nucleus		Plays a role in replication-dependent histone mRNA degradation. May be involved in the terminal uridylation of mature histone mRNAs before their degradation is initiated. DNA polymerase, probably involved in DNA repair. May play a role in sister chromatid cohesion.	Nucleus. Cytoplasm. Note=Predominantly expressed in the cytoplasm.	DNA polymerase type-B-like family
PCDHB4	PCDHB4	56131	Q9Y5E5	2.61941	-2.19653	-3.41848	0.000314858	Protocadherin beta-4 (PCDH-beta-4)	calcium ion binding; calcium-dependent cell-cell adhesion; cytoplasm; homophilic cell adhesion; integral to plasma membrane; intermediate filament cytoskeleton; synapse assembly; synaptic transmission		Potential calcium-dependent cell-adhesion protein. May be involved in the establishment and maintenance of specific neuronal connections in the brain.	Cell membrane; Single-pass type I membrane protein (By similarity).
PDCD1LG2	PDCD1LG2 B7DC CD273 PDCD1L2 PDL2	80380	Q9BQ51	-2.6263	-2.34407	-3.52024	0.000215579	Programmed cell death 1 ligand 2 (PD-1 ligand 2) (PD-L2) (PDCD1 ligand 2) (Programmed death ligand 2) (Butyrophilin B7-DC) (B7-DC) (CD antigen CD273)	T cell costimulation; endomembrane system; extracellular region; immune response; integral to membrane; plasma membrane; receptor activity		Involved in the costimulatory signal, essential for T-cell proliferation and IFNG production in a PDCD1-independent manner. Interaction with PDCD1 inhibits T-cell proliferation by blocking cell cycle progression and cytokine production (By similarity).	Isoform 3: Secreted (Probable). ; Isoform 2: Endomembrane system; Single-pass type I membrane protein. ; Isoform 1: Cell membrane; Single-pass type I membrane protein.	Immunoglobulin superfamily, BTN/MOG family
PERQ1	GIGYF1 CDS2 PERQ1 PP3360	64599	O75420	-2.41087	-4.81346	-5.38346	3.65331e-08	PERQ amino acid-rich with GYF domain-containing protein 1 (GRB10-interacting GYF protein 1)			May act cooperatively with GRB10 to regulate tyrosine kinase receptor signaling. May increase IGF1 receptor phosphorylation under IGF1 stimulation as well as phosphorylation of IRS1 and SHC1 (By similarity).		PERQ family
PGBD4	PGBD4	161779	Q96DM1	-4.62007	-3.04704	-5.53439	1.56155e-08	PiggyBac transposable element-derived protein 4
POLE2	POLE2 DPE2	5427	P56282	-2.22883	-3.82995	-4.43128	4.68384e-06	DNA polymerase epsilon subunit 2 (EC 2.7.7.7) (DNA polymerase II subunit 2) (DNA polymerase epsilon subunit B)	DNA binding; DNA-dependent DNA replication initiation; DNA-directed DNA polymerase activity; G1/S transition of mitotic cell cycle; M/G1 transition of mitotic cell cycle; S phase of mitotic cell cycle; nucleoplasm; nucleotide-excision repair, DNA gap filling; telomere maintenance via recombination; telomere maintenance via semi-conservative replication; transcription-coupled nucleotide-excision r…		Participates in DNA repair and in chromosomal DNA replication.	Nucleus.	DNA polymerase epsilon subunit B family
POLR1A	POLR1A	25885	O95602	-3.2415	-2.38193	-4.02255	2.87854e-05	DNA-directed RNA polymerase I subunit RPA1 (RNA polymerase I subunit A1) (EC 2.7.7.6) (A190) (DNA-directed RNA polymerase I largest subunit) (DNA-directed RNA polymerase I subunit A) (RNA polymerase I 194 kDa subunit) (RPA194)	DNA binding; DNA-directed RNA polymerase I complex; DNA-directed RNA polymerase activity; nucleoplasm; protein binding; termination of RNA polymerase I transcription; transcription elongation from RNA polymerase I promoter; transcription initiation from RNA polymerase I promoter; zinc ion binding	Q99728; Q05048; Q9H9Y6	DNA-dependent RNA polymerase catalyzes the transcription of DNA into RNA using the four ribonucleoside triphosphates as substrates. Largest and catalytic core component of RNA polymerase I which synthesizes ribosomal RNA precursors. Forms the polymerase active center together with the second largest subunit. A single stranded DNA template strand of the promoter is positioned within the central ac…	Nucleus, nucleolus (By similarity).	RNA polymerase beta' chain family
POPDC2	POPDC2 POP2	64091	Q9HBU9	-5.19048	-2.35081	-5.69802	6.0604e-09	Popeye domain-containing protein 2 (Popeye protein 2)	integral to membrane		May play an important role in heart development.	Membrane; Multi-pass membrane protein (Potential).	Popeye family
POT1	POT1	25913	Q9NUX5	-3.31903	-3.22531	-4.62802	1.84587e-06	Protection of telomeres protein 1 (hPot1) (POT1-like telomere end-binding protein)	DEAD/H-box RNA helicase binding; DNA duplex unwinding; negative regulation of telomere maintenance via telomerase; nuclear telomere cap complex; nucleoplasm; positive regulation of DNA strand elongation; positive regulation of helicase activity; positive regulation of telomerase activity; positive regulation of telomere maintenance via telomerase; single-stranded telomeric DNA binding; telomerase…	Q15554	Component of the telomerase ribonucleoprotein (RNP) complex that is essential for the replication of chromosome termini. Is a component of the double-stranded telomeric DNA-binding TRF1 complex which is involved in the regulation of telomere length by cis-inhibition of telomerase. Also acts as a single-stranded telomeric DNA-binding protein and thus may act as a downstream effector of the TRF1 co…	Nucleus. Chromosome, telomere. Note=Colocalizes with telomeric DNA.	Telombin family
POU2F2	POU2F2 OCT2 OTF2	5452	P09086	-2.78267	-3.64061	-4.58228	2.2997e-06	POU domain, class 2, transcription factor 2 (Lymphoid-restricted immunoglobulin octamer-binding protein NF-A2) (Octamer-binding protein 2) (Oct-2) (Octamer-binding transcription factor 2) (OTF-2)	cytoplasm; humoral immune response; nucleus; regulation of transcription, DNA-dependent; sequence-specific DNA binding; sequence-specific DNA binding transcription factor activity; transcription from RNA polymerase II promoter; transcription regulator activity		Transcription factor that specifically binds to the octamer motif (5'-ATTTGCAT-3'). Regulates transcription in a number of tissues in addition to activating immunoglobulin gene expression. Modulates transcription transactivation by NR3C1, AR and PGR. Isoform 5 activates the U2 small nuclear RNA (snRNA) promoter.	Cytoplasm (By similarity). Nucleus.	POU transcription factor family, Class-2 subfamily
POU4F1	POU4F1 BRN3A RDC1	5457	Q01851	-5.66854	-2.18574	-6.07535	6.18606e-10	POU domain, class 4, transcription factor 1 (Brain-specific homeobox/POU domain protein 3A) (Brain-3A) (Brn-3A) (Homeobox/POU domain protein RDC-1) (Oct-T1)	axonogenesis; nucleus; sequence-specific DNA binding; sequence-specific DNA binding transcription factor activity; synapse assembly; transcription regulator activity		Probable transcription factor which may play a role in the regulation of specific gene expression within a subset of neuronal lineages. May play a role in determining or maintaining the identities of a small subset of visual system neurons.	Nucleus.	POU transcription factor family, Class-4 subfamily
PRAM1	PRAM1	84106	Q96QH2	-2.57383	-4.16572	-4.89672	4.87247e-07	PML-RARA-regulated adapter molecule 1 (PRAM) (PRAM-1)	lipid binding; protein binding	Q9H0A6	May be involved in myeloid differentiation. May be involved in integrin signaling in neutrophils. Binds to PtdIns(4)P.
PRIM2	PRIM2 PRIM2A	5558	P49643	-3.20897	-2.57515	-4.11448	1.9403e-05	DNA primase large subunit (EC 2.7.7.-) (DNA primase 58 kDa subunit) (p58)	4 iron, 4 sulfur cluster binding; DNA binding; DNA primase activity; DNA replication, synthesis of RNA primer; DNA strand elongation involved in DNA replication; DNA-dependent DNA replication initiation; G1/S transition of mitotic cell cycle; M/G1 transition of mitotic cell cycle; S phase of mitotic cell cycle; alpha DNA polymerase:primase complex; metal ion binding; nucleoplasm; telomere mainten…		DNA primase is the polymerase that synthesizes small RNA primers for the Okazaki fragments made during discontinuous DNA replication.		Eukaryotic-type primase large subunit family
PRRG1	PRRG1 PRGP1 TMG1	5638	O14668	-4.47044	-2.12149	-4.94829	3.74341e-07	Transmembrane gamma-carboxyglutamic acid protein 1 (Proline-rich gamma-carboxyglutamic acid protein 1) (Proline-rich Gla protein 1)	calcium ion binding; extracellular region; integral to plasma membrane			Membrane; Single-pass type I membrane protein (Potential).
PSG5	PSG5	5673	Q15238	-5.62426	-3.62366	-6.69054	1.11178e-11	Pregnancy-specific beta-1-glycoprotein 5 (PS-beta-G-5) (PSBG-5) (Pregnancy-specific glycoprotein 5) (Fetal liver non-specific cross-reactive antigen 3) (FL-NCA-3)	extracellular region; female pregnancy			Secreted (Potential).	Immunoglobulin superfamily, CEA family
PSPH	PSPH	5723	P78330	-3.46169	-2.41254	-4.21944	1.22457e-05	Phosphoserine phosphatase (PSP) (PSPase) (EC 3.1.3.3) (L-3-phosphoserine phosphatase) (O-phosphoserine phosphohydrolase)	L-serine biosynthetic process; calcium ion binding; cytoplasm; magnesium ion binding; phosphoserine phosphatase activity; protein homodimerization activity	Q9NVP2; Q14558; Q9Y6J8	Catalyzes the last step in the biosynthesis of serine from carbohydrates. The reaction mechanism proceeds via the formation of a phosphoryl-enzyme intermediates.		SerB family
QRICH2	QRICH2	84074	Q9H0J4	-6.54158	-2.96386	-7.18169	3.44278e-13	Glutamine-rich protein 2	protein binding	P04406; O75352; P52948; Q9BZ23; O95863; O60232
RAB1B	RAB1B	81876	Q9H0U4	-2.65196	-3.31296	-4.24365	1.09956e-05	Ras-related protein Rab-1B	GTP binding; Golgi apparatus; membrane; protein binding; protein transport; small GTPase mediated signal transduction	P40337	Protein transport. Regulates vesicular transport between the endoplasmic reticulum and successive Golgi compartments.	Membrane; Lipid-anchor; Cytoplasmic side. Cytoplasm. Note=Targeted by REP1 to membranes of specific subcellular compartments including endoplasmic reticulum, Golgi apparatus, and intermediate vesicles between these two compartments. In the GDP-form, colocalizes with GDI in the cytoplasm (By similarity).	Small GTPase superfamily, Rab family
RBM43	RBM43 C2orf38	375287	Q6ZSC3	-2.94034	-2.31195	-3.74042	9.18569e-05	RNA-binding protein 43 (RNA-binding motif protein 43)	RNA binding; nucleotide binding
RBP1	RBP1 CRBP1	5947	P09455	-2.38474	-4.30711	-4.92323	4.25643e-07	Retinol-binding protein 1 (Cellular retinol-binding protein) (CRBP) (Cellular retinol-binding protein I) (CRBP-I)	cytoplasm; retinal binding; retinol binding; transporter activity		Intracellular transport of retinol.	Cytoplasm.	Calycin superfamily, Fatty-acid binding protein (FABP) family
RHOT1	RHOT1 ARHT1	55288	Q8IXI2	-2.77802	-2.92122	-4.03124	2.7742e-05	Mitochondrial Rho GTPase 1 (MIRO-1) (hMiro-1) (EC 3.6.5.-) (Rac-GTP-binding protein-like protein) (Ras homolog gene family member T1)	GTP binding; apoptosis; calcium ion binding; cellular homeostasis; cytosol; hydrolase activity; integral to mitochondrial outer membrane; mitochondrion transport along microtubule; plasma membrane; protein binding; regulation of small GTPase mediated signal transduction; small GTPase mediated signal transduction	O60282; P56536; Q9UPV9; Q8R2H7	Mitochondrial GTPase involved in mitochondrial trafficking. Probably involved in control of anterograde transport of mitochondria and their subcellular distribution.	Mitochondrion outer membrane; Single-pass type IV membrane protein (Probable).	Mitochondrial Rho GTPase family
RHOV	RHOV ARHV WRCH2	171177	Q96L33	-5.17537	-4.68763	-6.98272	1.44764e-12	Rho-related GTP-binding protein RhoV (CDC42-like GTPase 2) (GTP-binding protein-like 2) (Rho GTPase-like protein ARHV) (Wnt-1 responsive Cdc42 homolog 2) (WRCH-2)	GTP binding; cytosol; endosome membrane; metal ion binding; plasma membrane; regulation of small GTPase mediated signal transduction; small GTPase mediated signal transduction		Plays a role in the control of the actin cytoskeleton via activation of the JNK pathway (By similarity).	Cell membrane; Lipid-anchor; Cytoplasmic side (By similarity). Endosome membrane; Lipid-anchor; Cytoplasmic side (By similarity). Note=Treatment with TNF activates endosomal but not plasma membrane RHOV (By similarity).	Small GTPase superfamily, Rho family
RILPL1	RILPL1	353116	Q5EBL4	-4.7759	-2.65784	-5.46565	2.30603e-08	RILP-like protein 1 (Rab-interacting lysosomal-like protein 1)	cytosol; neuroprotection		Neuroprotective protein, which acts by sequestring GAPDH in the cytosol and prevent the apoptotic function of GAPDH in the nucleus. Competes with SIAH1 for binding GAPDH (By similarity). Does not regulate lysosomal morphology and distribution.	Cytoplasm, cytosol.	RILPL family
RMND5B	RMND5B UNQ2508/PRO5996	64777	Q96G75	-3.27528	-3.41644	-4.73281	1.10716e-06	Protein RMD5 homolog B
RNF151	RNF151	146310	Q2KHN1	-2.57185	-3.45362	-4.30603	8.31043e-06	RING finger protein 151	cell differentiation; cytoplasm; nucleus; spermatogenesis; ubiquitin ligase complex; ubiquitin-protein ligase activity; zinc ion binding		May be involved in acrosome formation of spermatids.	Cytoplasm (By similarity). Nucleus (By similarity).
RNF168	RNF168	165918	Q8IYW5	-4.66024	-4.51615	-6.48949	4.30642e-11	E3 ubiquitin-protein ligase RNF168 (EC 6.3.2.-) (RING finger protein 168)	chromatin binding; double-strand break repair; histone H2A K63-linked ubiquitination; histone binding; nucleus; positive regulation of DNA repair; response to ionizing radiation; ubiquitin binding; ubiquitin ligase complex; ubiquitin-protein ligase activity; zinc ion binding	P0CG47; P61088	E3 ubiquitin-protein ligase required for accumulation of repair proteins to sites of DNA damage. Acts with UBE2N/UBC13 to amplify the RNF8-dependent histone ubiquitination. Recruited to sites of DNA damage at double-strand breaks (DSBs) by binding to ubiquitinated histone H2A and ubiquitinates histone H2A and H2AX, leading to amplify the RNF8-dependent H2A ubiquitination and promoting the formati…	Nucleus. Note=Localizes to sites of DNA damage.	RNF168 family
RNF208	RNF208	727800	Q9H0X6	-2.15952	-7.20232	-7.5191	2.75768e-14	RING finger protein 208	zinc ion binding
RNMT	RNMT KIAA0398	8731	O43148	-4.43455	-2.69615	-5.18984	1.05236e-07	mRNA cap guanine-N7 methyltransferase (EC 2.1.1.56) (RG7MT1) (mRNA (guanine-N(7)-)-methyltransferase) (mRNA cap methyltransferase) (hCMT1) (hMet) (hcm1p)	RNA binding; mRNA (guanine-N7-)-methyltransferase activity; mRNA capping; nucleoplasm; transcription from RNA polymerase II promoter; viral reproduction		mRNA-capping methyltransferase that methylates the N7 position of the added guanosine to the 5'-cap structure of mRNAs. Binds RNA containing 5'-terminal GpppC.	Nucleus.	Methyltransferase superfamily, mRNA cap methyltransferase family
RPRD1B	RPRD1B C20orf77 CREPT	58490	Q9NQG5	-2.40558	-3.3347	-4.11182	1.96278e-05	Regulation of nuclear pre-mRNA domain-containing protein 1B (Cell cycle-related and expression-elevated protein in tumor)					UPF0400 (RTT103) family
RS1	RS1 XLRS1	6247	O15537	-4.32393	-2.27167	-4.88434	5.18866e-07	Retinoschisin (X-linked juvenile retinoschisis protein)	cell adhesion; extracellular space; multicellular organismal development; response to stimulus; visual perception		May be active in cell adhesion processes during retinal development.	Secreted.
RUNDC2A	RUNDC2A RUNDC2	84127	Q9HA26	-2.9422	-3.06709	-4.25013	1.06824e-05	RUN domain-containing protein 2A
S100A8	S100A8 CAGA CFAG MRP8	6279	P05109	-2.80011	-3.42295	-4.42235	4.88161e-06	Protein S100-A8 (Calgranulin-A) (Calprotectin L1L subunit) (Cystic fibrosis antigen) (CFAG) (Leukocyte L1 complex light chain) (Migration inhibitory factor-related protein 8) (MRP-8) (p8) (S100 calcium-binding protein A8) (Urinary stone protein band A)	calcium ion binding; chemotaxis; cytoplasm; cytoskeleton; plasma membrane; protein binding	Q38SD2; Q9H8S9; O60285; O75688; Q15853	Calcium-binding protein. Has antimicrobial activity towards bacteria and fungi. Important for resistance to invasion by pathogenic bacteria. Up-regulates transcription of genes that are under the control of NF-kappa-B. Plays a role in the development of endotoxic shock in response to bacterial lipopolysaccharide (LPS) (By similarity). Promotes tubulin polymerization. Promotes phagocyte migration …	Secreted. Cytoplasm. Cytoplasm, cytoskeleton. Cell membrane; Peripheral membrane protein. Note=Associates with tubulin filaments in activated monocytes. Targeted to the cell surface upon calcium influx. Released from blood leukocytes upon exposure to CSF2/GM-CSF, bacterial lipopolysaccharide (LPS) and during inflammatory processes. Serum levels are high in patients suffering from chronic inflamma…	S-100 family
SBF2	SBF2 CMT4B2 KIAA1766 MTMR13	81846	Q86WG5	-3.01878	-6.83485	-7.47183	3.9545e-14	Myotubularin-related protein 13 (SET-binding factor 2)	cytoplasm; membrane; myelination; phosphatase activity; protein binding			Cytoplasm. Membrane; Peripheral membrane protein. Note=Associated with membranes.	Protein-tyrosine phosphatase family, Non-receptor class myotubularin subfamily
SEC22A	SEC22A SEC22L2	26984	Q96IW7	-5.53742	-2.99389	-6.29495	1.53747e-10	Vesicle-trafficking protein SEC22a (SEC22 vesicle-trafficking protein homolog A) (SEC22 vesicle-trafficking protein-like 2)	ER to Golgi vesicle-mediated transport; endoplasmic reticulum membrane; integral to membrane; protein transport; transporter activity		May be involved in vesicle transport between the ER and the Golgi complex (By similarity).	Endoplasmic reticulum membrane; Multi-pass membrane protein (By similarity).	Synaptobrevin family
SEPT5	SEPT5 PNUTL1	5413	Q99719	-2.83368	-5.81046	-6.46461	5.07794e-11	Septin-5 (Cell division control-related protein 1) (CDCrel-1) (Peanut-like protein 1)	GTP binding; GTPase activity; cell cycle; cytokinesis; plasma membrane; protein binding; regulation of exocytosis; septin complex; structural molecule activity; synaptic vesicle; synaptic vesicle targeting	O95777; Q9NVA2; Q92599	Filament-forming cytoskeletal GTPase (By similarity). May play a role in cytokinesis (Potential). May play a role in platelet secretion (By similarity).	Cytoplasm (By similarity). Cytoplasm, cytoskeleton (By similarity). Note=In platelets, found in areas surrounding alpha-granules.	Septin family
SGIP1	SGIP1	84251	Q9BQI5	-2.99319	-3.48511	-4.59404	2.17375e-06	SH3-containing GRB2-like protein 3-interacting protein 1 (Endophilin-3-interacting protein)	AP-2 adaptor complex; SH3 domain binding; intracellular protein transport; microtubule binding; phospholipid binding; positive regulation of energy homeostasis; positive regulation of feeding behavior; positive regulation of receptor-mediated endocytosis; response to dietary excess; vesicle-mediated transport		Possible role in the regulation of energy homeostasis (By similarity).
SH2B1	SH2B1 KIAA1299 SH2B	25970	Q9NRF2	-4.06826	-2.75357	-4.91252	4.49559e-07	SH2B adapter protein 1 (Pro-rich, PH and SH2 domain-containing signaling mediator) (PSM) (SH2 domain-containing protein 1B)	blood coagulation; cytosol; intracellular signal transduction; membrane; nucleus; signal transducer activity		Adapter protein for several members of the tyrosine kinase receptor family. Involved in multiple signaling pathways mediated by Janus kinase (JAK) and receptor tyrosine kinases, including the receptors of insulin (INS), insulin-like growth factor I (IGF1), nerve growth factor (NGF), brain-derived neurotrophic factor (BDNF), glial cell line-derived neurotrophic factor (GDNF), platelet-derived grow…	Cytoplasm (By similarity). Membrane (Probable). Nucleus (By similarity). Note=Shuttles between the nucleus and the cytoplasm (By similarity).	SH2B adapter family
SKIV2L	SKIV2L DDX13 SKI2W SKIV2 W	6499	Q15477	-5.64602	-2.31104	-6.10069	5.28062e-10	Helicase SKI2W (EC 3.6.4.-) (Helicase-like protein) (HLP)	ATP binding; ATP-dependent RNA helicase activity; RNA binding; nucleus; protein binding	Q9UQ88; Q01780; Q9NPD3; P14678; O75083	Helicase; has ATPase activity.	Nucleus (Potential).	Helicase family, SKI2 subfamily
SLAMF6	SLAMF6 KALI UNQ6123/PRO20080	114836	Q96DU3	-3.21114	-2.21295	-3.89982	4.81328e-05	SLAM family member 6 (Activating NK receptor) (NK-T-B-antigen) (NTB-A) (CD antigen CD352)	integral to membrane; plasma membrane; receptor activity		Triggers cytolytic activity only in natural killer cells (NK) expressing high surface densities of natural cytotoxicity receptors.	Cell membrane; Single-pass type I membrane protein (Probable).
SLC13A4	SLC13A4 SUT1	26266	Q9UKG4	-3.18692	-2.73539	-4.19985	1.33543e-05	Solute carrier family 13 member 4 (Na(+)/sulfate cotransporter SUT-1) (NaS2)	integral to plasma membrane; sodium:sulfate symporter activity		Sodium/sulfate cotransporter that mediates sulfate reabsorption in the high endothelial venules (HEV).	Membrane; Multi-pass membrane protein.	SLC13A transporter (TC 2.A.47) family, NADC subfamily
SLC16A12	SLC16A12 MCT12	387700	Q6ZSM3	-2.42479	-2.1516	-3.24176	0.000593972	Monocarboxylate transporter 12 (MCT 12) (Solute carrier family 16 member 12)	integral to membrane; plasma membrane; symporter activity		Proton-linked monocarboxylate transporter. Catalyzes the rapid transport across the plasma membrane of many monocarboxylates (By similarity).	Cell membrane; Multi-pass membrane protein (By similarity).	Major facilitator superfamily, Monocarboxylate porter (TC 2.A.1.13) family
SLC22A23	SLC22A23 C6orf85	63027	A1A5C7	-2.8814	-5.71105	-6.39676	7.93525e-11	Solute carrier family 22 member 23	integral to membrane; ion transport; transmembrane transport; transporter activity			Membrane; Multi-pass membrane protein (Potential).	Major facilitator superfamily, Organic cation transporter family
SLC22A5	SLC22A5 OCTN2	6584	O76082	-2.63383	-3.37564	-4.28159	9.27821e-06	Solute carrier family 22 member 5 (High-affinity sodium-dependent carnitine cotransporter) (Organic cation/carnitine transporter 2)	ATP binding; PDZ domain binding; apical plasma membrane; brush border membrane; carnitine transporter activity; integral to membrane; positive regulation of intestinal epithelial structure maintenance; quorum sensing involved in interaction with host; sodium ion transport; sodium-dependent organic cation transport; symporter activity		Sodium-ion dependent, high affinity carnitine transporter. Involved in the active cellular uptake of carnitine. Transports one sodium ion with one molecule of carnitine. Also transports organic cations such as tetraethylammonium (TEA) without the involvement of sodium. Also relative uptake activity ratio of carnitine to TEA is 11.3.	Membrane; Multi-pass membrane protein.	Major facilitator superfamily, Organic cation transporter family
SLC29A3	SLC29A3 ENT3 UNQ717/PRO1380	55315	Q9BZD2	-4.01314	-7.78301	-8.75674	1.00487e-18	Equilibrative nucleoside transporter 3 (hENT3) (Solute carrier family 29 member 3)	integral to membrane; late endosome membrane; lysosomal membrane; nucleobase, nucleoside and nucleotide metabolic process; nucleoside transmembrane transporter activity		Mediates both influx and efflux of nucleosides across the membrane (equilibrative transporter). Mediates transport of adenine, adenosine and uridine, as well as several nucleoside analog drugs, such as anticancer and antiviral agents, including cladribine, cordycepin, tubercidin and AZT. Does not transport hypoxanthine.	Membrane; Multi-pass membrane protein. Late endosome membrane. Lysosome membrane. Note=Observed in a punctate intracellular pattern showing partial colocalization with late endosomes/lysosomes. Not detected at the cell surface.	SLC29A transporter family
SLC38A7	SLC38A7	55238	Q9NVC3	-2.9002	-5.60621	-6.31196	1.37766e-10	Putative sodium-coupled neutral amino acid transporter 7	amino acid transport; integral to membrane; sodium ion transport		Putative sodium-dependent amino acid/proton antiporter (By similarity).	Membrane; Multi-pass membrane protein (Potential).	Amino acid/polyamine transporter 2 family
SOX11	SOX11	6664	P35716	-2.68859	-3.02796	-4.04933	2.56821e-05	Transcription factor SOX-11	DNA binding; cytoplasm; nucleolus; translation factor activity, nucleic acid binding		Probably important in the developing nervous system. May also have a role in tissue modeling during development.	Nucleus (By similarity).
SPATA21	SPATA21	374955	Q7Z572	-2.73377	-2.81593	-3.92466	4.34257e-05	Spermatogenesis-associated protein 21	calcium ion binding		Involved in the differentiation of haploid spermatids (By similarity).
SPHK1	SPHK1 SPHK SPK	8877	Q9NYA1	-3.59053	-3.32557	-4.89401	4.94012e-07	Sphingosine kinase 1 (SK 1) (SPK 1) (EC 2.7.1.91)	'de novo' posttranslational protein folding; ATP binding; D-erythro-sphingosine kinase activity; DNA binding; activation of protein kinase C activity by G-protein coupled receptor protein signaling pathway; anti-apoptosis; calcium-mediated signaling; calmodulin binding; cytosol; diacylglycerol kinase activity; magnesium ion binding; membrane fraction; nucleus; plasma membrane; positive regulation…	P68104; Q14192; P06241; Q2M3C7	Catalyzes the phosphorylation of sphingosine to form sphingosine 1-phosphate (SPP), a lipid mediator with both intra- and extracellular functions. Also acts on D-erythro-sphingosine and to a lesser extent sphinganine, but not other lipids, such as D,L-threo-dihydrosphingosine, N,N-dimethylsphingosine, diacylglycerol, ceramide, or phosphatidylinositol.	Cytoplasm. Nucleus.
SPRR3	SPRR3 SPRC	6707	Q9UBC9	-2.67148	-2.80697	-3.87504	5.33044e-05	Small proline-rich protein 3 (22 kDa pancornulin) (Cornifin beta) (Esophagin)	cytoplasm; keratinization; protein binding; structural molecule activity; wound healing		Cross-linked envelope protein of keratinocytes.	Cytoplasm.	Cornifin (SPRR) family
SRP72	SRP72	6731	O76094	-2.67501	-2.1806	-3.45119	0.000279064	Signal recognition particle 72 kDa protein (SRP72)	7S RNA binding; SRP-dependent cotranslational protein targeting to membrane; cytosol; nucleolus; plasma membrane; response to drug; signal recognition particle binding; signal recognition particle, endoplasmic reticulum targeting		Signal-recognition-particle assembly has a crucial role in targeting secretory proteins to the rough endoplasmic reticulum membrane. Binds the 7S RNA only in presence of SRP68. This ribonucleoprotein complex might interact directly with the docking protein in the ER membrane and possibly participate in the elongation arrest function.	Cytoplasm.	SRP72 family
SSSCA1	SSSCA1	10534	O60232	-2.49272	-4.11046	-4.80723	7.65167e-07	Sjoegren syndrome/scleroderma autoantigen 1 (Autoantigen p27)	cell division; mitosis; protein binding	O60496; Q02413; Q96NW7; Q99873; Q9H0J4; Q9Y230	Might play a role in mitosis. Antigenic molecule. Could be a centromere-associated protein. May induce anti-centromere antibodies.
STBD1	STBD1 GENX-3414	8987	O95210	-2.2456	-2.6245	-3.45408	0.000276082	Starch-binding domain-containing protein 1 (Genethonin-1)	carbohydrate binding; carbohydrate metabolic process; catalytic activity; integral to plasma membrane; membrane fraction; muscle contraction; protein binding	O95166; Q9H0R8; P60520; Q9GZQ8	May have the capability to bind to carbohydrates (Potential).	Membrane; Single-pass type III membrane protein (Probable). Note=Distributed in the transverse tubules and/or near the junctional sarcoplasmic reticulum.
SULT1B1	SULT1B1 ST1B2 SULT1B2	27284	O43704	-2.21512	-6.0495	-6.4423	5.88373e-11	Sulfotransferase family cytosolic 1B member 1 (ST1B1) (Sulfotransferase 1B1) (EC 2.8.2.-) (Sulfotransferase 1B2) (ST1B2) (Thyroid hormone sulfotransferase)	3'-phosphoadenosine 5'-phosphosulfate metabolic process; cellular biogenic amine metabolic process; cytosol; flavonoid metabolic process; steroid metabolic process; sulfation; thyroid hormone metabolic process; xenobiotic metabolic process		Catalyzes the sulfate conjugation of many hormones, neurotransmitters, drugs and xenobiotic compounds. Sulfonation increases the water solubility of most compounds, and therefore their renal excretion, but it can also result in bioactivation to form active metabolites. Sulfates dopamine, small phenols such as 1-naphthol and p-nitrophenol and thyroid hormones, including 3,3'-diiodothyronine, triid…	Cytoplasm (By similarity).	Sulfotransferase 1 family
SYP	SYP	6855	P08247	-2.16601	-4.1861	-4.71328	1.21878e-06	Synaptophysin (Major synaptic vesicle protein p38)	calcium ion binding; cell junction; cholesterol binding; integral to synaptic vesicle membrane; regulation of long-term neuronal synaptic plasticity; regulation of short-term neuronal synaptic plasticity; synaptic vesicle maturation; synaptic vesicle membrane organization; synaptosome; transporter activity		Possibly involved in structural functions as organizing other membrane components or in targeting the vesicles to the plasma membrane. Involved in the regulation of short-term and long-term synaptic plasticity (By similarity).	Cytoplasmic vesicle, secretory vesicle, synaptic vesicle membrane; Multi-pass membrane protein. Cell junction, synapse, synaptosome.	Synaptophysin/synaptobrevin family
TAF12	TAF12 TAF15 TAF2J TAFII20	6883	Q16514	-2.73949	-2.80419	-3.92024	4.42304e-05	Transcription initiation factor TFIID subunit 12 (Transcription initiation factor TFIID 20/15 kDa subunits) (TAFII-20/TAFII-15) (TAFII20/TAFII15)	DNA binding; PCAF complex; STAGA complex; general RNA polymerase II transcription factor activity; histone H3 acetylation; protein binding; regulation of transcription, DNA-dependent; transcription coactivator activity; transcription elongation from RNA polymerase II promoter; transcription factor TFIID complex; transcription factor TFTC complex; transcription initiation factor activity; transcri…		TAFs are components of the transcription factor IID (TFIID) complex, PCAF histone acetylase complex and TBP-free TAFII complex (TFTC). TAFs components-TIIFD are essential for mediating regulation of RNA polymerase transcription.	Nucleus.	TAF12 family
TAF7L	TAF7L TAF2Q	54457	Q5H9L4	-5.67544	-2.84806	-6.34997	1.07681e-10	Transcription initiation factor TFIID subunit 7-like (Cancer/testis antigen 40) (CT40) (RNA polymerase II TBP-associated factor subunit Q) (TATA box-binding protein-associated factor 50 kDa) (Transcription initiation factor TFIID 50 kDa subunit)	binding; cell differentiation; cytoplasm; general RNA polymerase II transcription factor activity; multicellular organismal development; regulation of transcription, DNA-dependent; spermatogenesis; transcription factor TFIID complex; transcription initiation from RNA polymerase II promoter		Probably functions as a spermatogensis-specific component of the DNA-binding general transcription factor complex TFIID, a multimeric protein complex that plays a central role in mediating promoter responses to various activators and repressors. May play a role in spermatogenesis (By similarity).	Nucleus (By similarity). Cytoplasm (By similarity). Note=Cytoplasmic in spermatogonia and early spermatocytes (preleptotene, leptotene, and zygotene); translocates into the nuclei of pachytene spermatocytes and round spermatids (By similarity).	TAF7 family
TBC1D10A	TBC1D10A EPI64 TBC1D10	83874	Q9BXI6	-3.14547	-2.58485	-4.0713	2.33761e-05	TBC1 domain family member 10A (EBP50-PDX interactor of 64 kDa) (EPI64 protein) (Rab27A-GAP-alpha)	PDZ domain binding; Rab GTPase activator activity; guanyl-nucleotide exchange factor activity; intracellular; microvillus		Acts as GTPase-activating protein for RAB27A, but not for RAB2A, RAB3A, nor RAB4A.	Cell projection, microvillus. Note=Localizes to the microvilli-rich region of the syncytiotrophoblast. In melanocytes, located at the periphery of cells.
TFPT	TFPT INO80F	29844	P0C1Z6	-3.02558	-3.92126	-4.95282	3.65724e-07	TCF3 fusion partner (INO80 complex subunit F) (Protein FB1)	DNA binding; cytoplasm; induction of apoptosis; nucleus; protein binding	Q96JC9; Q96CJ1; P55199	Component of the chromatin-remodeling INO80 complex which, in addition to chromatin remodeling implicated in crucial functions such as DNA repair, checkpoint regulation, DNA replication, telomemere maintenance and chromosome segregation. Appears to promote apoptosis in a p53/TP53-independent manner.	Nucleus (By similarity).
TGFBR1	TGFBR1	7046	P36897	-3.03277	-2.40094	-3.86811	5.48421e-05	TGF-beta receptor type-1 (TGFR-1) (EC 2.7.11.30) (Activin receptor-like kinase 5) (ALK-5) (Serine/threonine-protein kinase receptor R4) (SKR4) (TGF-beta type I receptor) (Transforming growth factor-beta receptor type I) (TGF-beta receptor type I) (TbetaR-I)	ATP binding; I-SMAD binding; activation of MAPKK activity; anterior/posterior pattern formation; artery morphogenesis; collagen fibril organization; embryonic cranial skeleton morphogenesis; germ cell migration; heart development; kidney development; metal ion binding; neuron fate commitment; palate development; parathyroid gland development; pathway-restricted SMAD protein phosphorylation; pepti…	Q9Y3F4; P63104	On ligand binding, forms a receptor complex consisting of two type II and two type I transmembrane serine/threonine kinases. Type II receptors phosphorylate and activate type I receptors which autophosphorylate, then bind and activate SMAD transcriptional regulators. Receptor for TGF-beta.	Membrane; Single-pass type I membrane protein.	Protein kinase superfamily, TKL Ser/Thr protein kinase family, TGFB receptor subfamily
TGIF1	TGIF1 TGIF	7050	Q15583	-3.77282	-3.19994	-4.94709	3.76649e-07	Homeobox protein TGIF1 (5'-TG-3'-interacting factor 1)	negative regulation of transcription from RNA polymerase II promoter; nucleus; sequence-specific DNA binding; sequence-specific DNA binding transcription factor activity; transcription corepressor activity	Q9HB66; Q9NVU7; O75716	Binds to a retinoid X receptor (RXR) responsive element from the cellular retinol-binding protein II promoter (CRBPII-RXRE). Inhibits the 9-cis-retinoic acid-dependent RXR alpha transcription activation of the retinoic acid responsive element. Active transcriptional corepressor of SMAD2. Links the nodal signaling pathway to the bifurcation of the forebrain and the establishment of ventral midline…	Nucleus.	TALE/TGIF homeobox family
TIMM9	TIMM9 TIM9 TIM9A TIMM9A	26520	Q9Y5J7	-2.33598	-2.98661	-3.79166	7.48223e-05	Mitochondrial import inner membrane translocase subunit Tim9	mitochondrial inner membrane presequence translocase complex; mitochondrial intermembrane space protein transporter complex; protein import into mitochondrial inner membrane; sensory perception of sound; transmembrane transport; zinc ion binding		Mitochondrial intermembrane chaperone that participates in the import and insertion of multi-pass transmembrane proteins into the mitochondrial inner membrane. May also be required for the transfer of beta-barrel precursors from the TOM complex to the sorting and assembly machinery (SAM complex) of the outer membrane. Acts as a chaperone-like protein that protects the hydrophobic precursors from …	Mitochondrion inner membrane; Peripheral membrane protein; Intermembrane side.	Small Tim family
TLCD1	TLCD1	116238	Q96CP7	-2.71142	-2.91214	-3.97899	3.46036e-05	TLC domain-containing protein 1	integral to membrane			Membrane; Multi-pass membrane protein (Potential).
TM4SF18	TM4SF18	116441	Q96CE8	-4.52613	-2.2542	-5.05641	2.13611e-07	Transmembrane 4 L6 family member 18	integral to membrane			Membrane; Multi-pass membrane protein (Potential).	L6 tetraspanin family
TMEM110	TMEM110	375346	Q86TL2	-4.72417	-3.45868	-5.85493	2.38601e-09	Transmembrane protein 110	integral to membrane			Membrane; Multi-pass membrane protein (Potential).
TMEM133	TMEM133 AD031	83935	Q9H2Q1	-4.73093	-4.91704	-6.82342	4.44505e-12	Transmembrane protein 133	integral to membrane			Membrane; Multi-pass membrane protein (Potential).
TMEM17	TMEM17	200728	Q86X19	-2.35647	-4.78619	-5.33485	4.78128e-08	Transmembrane protein 17	integral to membrane			Membrane; Multi-pass membrane protein (Potential).
TMEM170	TMEM170A TMEM170	124491	Q8WVE7	-4.00069	-3.27446	-5.16987	1.17126e-07	Transmembrane protein 170A	integral to membrane			Membrane; Multi-pass membrane protein (Potential).	TMEM170 family
TMEM189	TMEM189 KUA	387521	A5PLL7	-2.47824	-3.38902	-4.19847	1.34363e-05	Transmembrane protein 189	endoplasmic reticulum membrane; integral to membrane			Endoplasmic reticulum membrane; Multi-pass membrane protein.
TMEM215	TMEM215	401498	Q68D42	-3.17799	-2.50996	-4.04963	2.56491e-05	Transmembrane protein 215	integral to membrane			Membrane; Multi-pass membrane protein (Potential).
TMEM28	FAM155B TED TMEM28	27112	O75949	-2.6414	-2.38504	-3.55885	0.00018624	Transmembrane protein FAM155B (Protein TED) (Transmembrane protein 28)	integral to membrane			Membrane; Multi-pass membrane protein (Potential).	FAM155 family
TMEM39A	TMEM39A	55254	Q9NV64	-3.86551	-4.11445	-5.64543	8.23865e-09	Transmembrane protein 39A	integral to membrane			Membrane; Multi-pass membrane protein (Potential).	TMEM39 family
TNRC6A	TNRC6A CAGH26 KIAA1460 TNRC6	27327	Q8NDV7	-3.20784	-2.36683	-3.98649	3.35284e-05	Trinucleotide repeat-containing gene 6A protein (CAG repeat protein 26) (EMSY interactor protein) (GW182 autoantigen) (Protein GW1) (Glycine-tryptophan protein of 182 kDa)	RNA binding; cytoplasmic mRNA processing body; micro-ribonucleoprotein complex; negative regulation of translation involved in gene silencing by miRNA; nucleotide binding		Plays a role in RNA-mediated gene silencing by both micro-RNAs (miRNAs) and short interfering RNAs (siRNAs). Required for miRNA-dependent repression of translation and for siRNA-dependent endonucleolytic cleavage of complementary mRNAs by argonaute family proteins.	Cytoplasm, P-body. Note=Mammalian P-bodies are also known as GW bodies (GWBs).	GW182 family
TNS4	TNS4 CTEN PP14434	84951	Q8IZW8	-2.98117	-2.7533	-4.05809	2.47381e-05	Tensin-4 (C-terminal tensin-like protein)	actin binding; apoptosis; cytoplasm; cytoskeleton; focal adhesion; protein localization		May be involved in cell migration, cartilage development and in linking signal transduction pathways to the cytoskeleton (By similarity). May promote apoptosis, via its cleavage by caspase-3.	Cell junction, focal adhesion. Cytoplasm, cytoskeleton.
TSPAN14	TSPAN14 TM4SF14	81619	Q8NG11	-3.6615	-2.85888	-4.6454	1.69709e-06	Tetraspanin-14 (Tspan-14) (DC-TM4F2) (Transmembrane 4 superfamily member 14)	integral to membrane			Membrane; Multi-pass membrane protein (Probable).	Tetraspanin (TM4SF) family
TTC16	TTC16	158248	Q8NEE8	-5.35457	-4.57905	-7.04551	9.23943e-13	Tetratricopeptide repeat protein 16 (TPR repeat protein 16)	binding
TTYH3	TTYH3 KIAA1691	80727	Q9C0H2	-2.74187	-2.46082	-3.68422	0.000114701	Protein tweety homolog 3 (hTTY3)	chloride channel activity; chloride channel complex; plasma membrane		Probable large-conductance Ca(2+)-activated chloride channel. May play a role in Ca(2+) signal transduction.	Cell membrane; Multi-pass membrane protein.	Tweety family
UBE2L6	UBE2L6 UBCH8	9246	O14933	-2.62696	-2.18996	-3.42007	0.000313028	Ubiquitin/ISG15-conjugating enzyme E2 L6 (EC 6.3.2.19) (Retinoic acid-induced gene B protein) (RIG-B) (UbcH8) (Ubiquitin carrier protein L6) (Ubiquitin-protein ligase L6)	cytosol; negative regulation of type I interferon production; post-translational protein modification; protein binding; ubiquitin-protein ligase activity	Q7Z419; Q6ZMZ0	Catalyzes the covalent attachment of ubiquitin or ISG15 to other proteins. Functions in the E6/E6-AP-induced ubiquitination of p53/TP53.		Ubiquitin-conjugating enzyme family
UGT3A2	UGT3A2 PSEC0073 UNQ842/PRO1780	167127	Q3SY77	-4.42225	-2.48592	-5.07308	1.95713e-07	UDP-glucuronosyltransferase 3A2 (UDPGT 3A2) (EC 2.4.1.17)	glucuronosyltransferase activity; integral to membrane		UDP-glucuronosyltransferases catalyze phase II biotransformation reactions in which lipophilic substrates are conjugated with glucuronic acid to increase water solubility and enhance excretion. They are of major importance in the conjugation and subsequent elimination of potentially toxic xenobiotics and endogenous compounds (By similarity).	Membrane; Single-pass type I membrane protein (Potential).	UDP-glycosyltransferase family
USH1G	USH1G SANS	124590	Q495M9	-3.27957	-2.25159	-3.9781	3.47344e-05	Usher syndrome type-1G protein (Scaffold protein containing ankyrin repeats and SAM domain)	actin cytoskeleton; equilibrioception; photoreceptor cell maintenance; response to stimulus; sensory perception of sound		Unknown. Required for normal hearing. May have a role in the development and maintenance of the stereocilia bundles. Might function as an anchoring/scaffolding protein in hair cells. Could be involved in the functional network formed by USH1C, CDH23 and MYO7A that is required for cohesion of the growing hair bundle.
USP40	USP40	55230	Q9NVE5	-2.34296	-5.17739	-5.68285	6.62326e-09	Ubiquitin carboxyl-terminal hydrolase 40 (EC 3.4.19.12) (Deubiquitinating enzyme 40) (Ubiquitin thiolesterase 40) (Ubiquitin-specific-processing protease 40)	cysteine-type peptidase activity; ubiquitin thiolesterase activity; ubiquitin-dependent protein catabolic process		May be catalytically inactive.		Peptidase C19 family
UTP20	UTP20 DRIM	27340	O75691	-3.04578	-2.78509	-4.12717	1.83631e-05	Small subunit processome component 20 homolog (Down-regulated in metastasis protein) (Novel nucleolar protein 73) (NNP73) (Protein Key-1A6)	90S preribosome; cytoplasm; endonucleolytic cleavage in 5'-ETS of tricistronic rRNA transcript (SSU-rRNA, 5.8S rRNA, LSU-rRNA); endonucleolytic cleavage in ITS1 to separate SSU-rRNA from 5.8S rRNA and LSU-rRNA from tricistronic rRNA transcript (SSU-rRNA, 5.8S rRNA, LSU-rRNA); endonucleolytic cleavage to generate mature 5'-end of SSU-rRNA from (SSU-rRNA, 5.8S rRNA, LSU-rRNA); negative regulation o…	Q5T8A7	Involved in 18S pre-rRNA processing. Associates with U3 snoRNA.	Nucleus, nucleolus. Note=Colocalizes with NCL in the nucleolus.	UTP20 family
VAX2	VAX2	25806	Q9UIW0	-4.51873	-2.28132	-5.06195	2.0749e-07	Ventral anterior homeobox 2	ectoderm development; nucleus; sequence-specific DNA binding; sequence-specific DNA binding transcription factor activity; transcription regulator activity; visual perception		Plays a crucial role in eye development and, in particular, in the specification of the ventral optic vesicle (By similarity). May be a regulator of axial polarization in the retina.	Nucleus (Probable).	EMX homeobox family
VPS33B	VPS33B	26276	Q9H267	-5.46235	-3.20844	-6.33493	1.18726e-10	Vacuolar protein sorting-associated protein 33B (hVPS33B)	cellular membrane fusion; late endosome membrane; lysosomal membrane; lysosome localization; melanosome localization; perinuclear region of cytoplasm; platelet alpha granule; platelet alpha granule organization; protein binding; protein transport; vesicle docking involved in exocytosis	Q9H9C1	May play a role in vesicle-mediated protein trafficking to lysosomal compartments and in membrane docking/fusion reactions of late endosomes/lysosomes. Mediates phagolysosomal fusion in macrophages.	Late endosome membrane; Peripheral membrane protein; Cytoplasmic side. Lysosome membrane; Peripheral membrane protein; Cytoplasmic side. Note=Cytoplasmic, peripheral membrane protein associated with late endosomes/lysosomes. Colocalizes with M.tuberculosis PtpA in the cytosol of tuberculosis-infected macrophages and associates with phagosomes.	STXBP/unc-18/SEC1 family
VTN	VTN	7448	P04004	-4.70091	-3.40888	-5.80681	3.18377e-09	Vitronectin (S-protein) (Serum-spreading factor) (V75) [Cleaved into: Vitronectin V65 subunit; Vitronectin V10 subunit; Somatomedin-B]	alphav-beta3 integrin-vitronectin complex; cell adhesion mediated by integrin; extracellular space; heparin binding; immune response; integrin binding; negative regulation of blood coagulation; negative regulation of endopeptidase activity; positive regulation of peptidyl-tyrosine phosphorylation; positive regulation of protein binding; positive regulation of receptor-mediated endocytosis; positi…	P05121	Vitronectin is a cell adhesion and spreading factor found in serum and tissues. Vitronectin interact with glycosaminoglycans and proteoglycans. Is recognized by certain members of the integrin family and serves as a cell-to-substrate adhesion molecule. Inhibitor of the membrane-damaging effect of the terminal cytolytic complement pathway.; Somatomedin-B is a growth hormone-dependent serum factor …	Secreted, extracellular space.
WDR86	WDR86	349136	Q86TI4	-3.03883	-3.22062	-4.42797	4.75626e-06	WD repeat-containing protein 86
WDSOF1	DCAF13 WDSOF1 HSPC064	25879	Q9NV06	-4.65619	-4.93328	-6.78361	5.86035e-12	DDB1- and CUL4-associated factor 13 (WD repeat and SOF domain-containing protein 1)	CUL4 RING ubiquitin ligase complex; nucleolus; protein ubiquitination; rRNA processing; ribonucleoprotein complex		Possible role in ribosomal RNA processing (By similarity). May function as a substrate receptor for CUL4-DDB1 E3 ubiquitin-protein ligase complex.	Nucleus, nucleolus (By similarity).	WD repeat DCAF13/WDSOF1 family
XAGE3	XAGE3 GAGED4 PLAC6 PP9012	170626	Q8WTP9	-2.90896	-2.1865	-3.63907	0.000136814	G antigen family D member 4 (Cancer/testis antigen 12.3) (CT12.3) (Placenta-specific gene 6 protein) (Protein XAGE-3)					GAGE family
XYLT2	XYLT2 XT2 UNQ3058/PRO9878	64132	Q9H1B5	-3.63166	-3.55932	-5.08504	1.8377e-07	Xylosyltransferase 2 (EC 2.4.2.26) (Peptide O-xylosyltransferase 1) (Xylosyltransferase II) (XT-II) (XylT-II)	Golgi membrane; acetylglucosaminyltransferase activity; endoplasmic reticulum membrane; glycosaminoglycan biosynthetic process; integral to membrane; protein xylosyltransferase activity		Probably catalyzes the first step in biosynthesis of glycosaminoglycan. Transfers D-xylose from UDP-D-xylose to specific serine residues of the core protein. Initial enzyme in the biosynthesis of chondroitin sulfate and dermatan sulfate proteoglycans in fibroblasts and chondrocytes (By similarity). Its enzyme activity has not been demonstrated.	Endoplasmic reticulum membrane; Single-pass type II membrane protein (By similarity). Golgi apparatus membrane; Single-pass type II membrane protein (By similarity).	Glycosyltransferase 14 family, XylT subfamily
YIPF1	YIPF1	54432	Q9Y548	-6.05192	-3.75613	-7.1228	5.28793e-13	Protein YIPF1 (YIP1 family member 1)	integral to membrane; transport vesicle			Membrane; Multi-pass membrane protein (Potential).	YIP1 family
ZBTB8OS	ZBTB8OS ARCH	339487	Q8IWT0	-4.85482	-2.22601	-5.34082	4.62629e-08	Protein archease (Protein ZBTB8OS) (Zinc finger and BTB domain-containing opposite strand protein 8)					Archease family
ZCCHC2	ZCCHC2 KIAA1744	54877	Q9C0B9	-2.49529	-2.12932	-3.28032	0.000518452	Zinc finger CCHC domain-containing protein 2	cell communication; cytoplasm; nucleic acid binding; phosphatidylinositol binding; zinc ion binding
ZDHHC4	ZDHHC4 ZNF374 DC1 UNQ5787/PRO19576	55146	Q9NPG8	-2.23454	-2.61246	-3.43775	0.000293287	Probable palmitoyltransferase ZDHHC4 (EC 2.3.1.-) (Zinc finger DHHC domain-containing protein 4) (DHHC-4) (Zinc finger protein 374)	acyltransferase activity; integral to membrane; zinc ion binding			Membrane; Multi-pass membrane protein (Potential).	DHHC palmitoyltransferase family
ZFP1	ZFP1 ZNF475	162239	Q6P2D0	-2.17662	-2.81266	-3.55651	0.000187909	Zinc finger protein 1 homolog (Zfp-1) (Zinc finger protein 475)	DNA binding; nucleus; regulation of transcription, DNA-dependent; transcription, DNA-dependent; zinc ion binding		May be involved in transcriptional regulation.	Nucleus (Probable).	Krueppel C2H2-type zinc-finger protein family
ZNF286B	ZNF286B ZNF286C ZNF286L	729288	P0CG31	-3.35618	-2.47973	-4.17289	1.5038e-05	Putative zinc finger protein 286B	DNA binding; nucleus; regulation of transcription, DNA-dependent; transcription, DNA-dependent; zinc ion binding		May be involved in transcriptional regulation (By similarity).	Nucleus (Probable).	Krueppel C2H2-type zinc-finger protein family
ZNF431	ZNF431 KIAA1969	170959	Q8TF32	-2.49023	-3.22404	-4.07378	2.31286e-05	Zinc finger protein 431	DNA binding; nucleus; regulation of transcription, DNA-dependent; transcription, DNA-dependent; zinc ion binding		May be involved in transcriptional regulation.	Nucleus (Potential).	Krueppel C2H2-type zinc-finger protein family
ZNF433	ZNF433	163059	Q8N7K0	-2.8417	-4.59007	-5.39852	3.35967e-08	Zinc finger protein 433	DNA binding; nucleus; regulation of transcription, DNA-dependent; transcription, DNA-dependent; zinc ion binding		May be involved in transcriptional regulation.	Nucleus (Potential).	Krueppel C2H2-type zinc-finger protein family
ZNF586	ZNF586	54807	Q9NXT0	-2.66951	-3.00719	-4.02113	2.89602e-05	Zinc finger protein 586	DNA binding; nucleus; regulation of transcription, DNA-dependent; transcription, DNA-dependent; zinc ion binding		May be involved in transcriptional regulation.	Nucleus (Probable).	Krueppel C2H2-type zinc-finger protein family
ZNF607	ZNF607	84775	Q96SK3	-3.27282	-5.9001	-6.74703	7.54487e-12	Zinc finger protein 607	DNA binding; nucleus; regulation of transcription, DNA-dependent; transcription, DNA-dependent; zinc ion binding		May be involved in transcriptional regulation.	Nucleus (Potential).	Krueppel C2H2-type zinc-finger protein family
ZNF678	ZNF678	339500	Q5SXM1	-3.25658	-3.3484	-4.67088	1.49958e-06	Zinc finger protein 678	DNA binding; nucleus; regulation of transcription, DNA-dependent; transcription, DNA-dependent; zinc ion binding		May be involved in transcriptional regulation.	Nucleus (Probable).	Krueppel C2H2-type zinc-finger protein family
ZNF778	ZNF778	197320	Q96MU6	-5.1662	-3.85402	-6.4454	5.7649e-11	Zinc finger protein 778	DNA binding; nucleus; regulation of transcription, DNA-dependent; transcription, DNA-dependent; zinc ion binding		May be involved in transcriptional regulation (By similarity).	Nucleus (Probable).	Krueppel C2H2-type zinc-finger protein family
