# Supplementary material for: Human Genome-Wide RNAi Screen for Host Factors That Modulate Intracellular Salmonella Growth
Source: PLoS One. 2012 Jun 11;7(6):e38097. doi: 10.1371/journal.pone.0038097 (PMC3372477; doi:10.1371/journal.pone.0038097)
Supplement: Table S2 — The uniprot derived gene annotations and the raw numerical data for the up hits. (XLSX) [file pone.0038097.s005.xlsx]

## Sheet: Sheet1
Up Hits
Gene Symbol	Gene names	Entrez ID	UniProt Accession	Standard Deviation Plate 1	Standard Deviation Plate 2	2D Standard Devitation	P-value	Protein names	Gene ontology	Interacts with (Uniprot Accession)	Function	Subcellular Location	Protein family
BEND2	BEND2 CXorf20	139105	Q8NDZ0	3.56669	3.56835	5.04524	2.26477e-07	BEN domain-containing protein 2
C12orf61	C12orf61	283416	Q8N7H1	2.8037	2.45693	3.7279	9.65414e-05	Putative uncharacterized protein C12orf61
C17orf55	C17orf55	284185	Q8N8I6	2.58873	2.2918	3.45744	0.000272671	Putative uncharacterized protein LINC00482
C20orf27	C20orf27	54976	Q9GZN8	2.38793	4.89108	5.44287	2.62138e-08	UPF0687 protein C20orf27					UPF0687 family
FAM47C	FAM47C	442444	Q5HY64	3.37725	3.45251	4.82966	6.83827e-07	Putative protein FAM47C					FAM47 family
FAM71C	FAM71C	196472	Q8NEG0	2.30327	2.40286	3.32848	0.000436603	Protein FAM71C					FAM71 family
FOXJ1	FOXJ1 FKHL13 HFH4	2302	Q92949	5.44442	2.13056	5.84646	2.51078e-09	Forkhead box protein J1 (Forkhead-related protein FKHL13) (Hepatocyte nuclear factor 3 forkhead homolog 4) (HFH-4)	DNA binding, bending; actin cytoskeleton organization; activation of Rho GTPase activity; central tolerance induction; cilium assembly; double-stranded DNA binding; epithelial cell differentiation; establishment of apical/basal cell polarity; heart looping; humoral immune response; left/right pattern formation; leukocyte migration; lung development; negative regulation of B cell activation; negat…		May play an important role in cell fate determination during lung development and in spermatogenesis (By similarity).	Nucleus.
GATA6	GATA6	2627	Q92908	2.46246	3.85499	4.57435	2.38852e-06	Transcription factor GATA-6 (GATA-binding factor 6)	blood coagulation; cardiac vascular smooth muscle cell differentiation; cellular response to hypoxia; intestinal epithelial cell differentiation; male gonad development; negative regulation of apoptotic process; negative regulation of transcription from RNA polymerase II promoter; negative regulation of transforming growth factor beta1 production; negative regulation of transforming growth factor…		Thought to be important for regulating terminal differentiation and/or proliferation.	Nucleus.
GNB1	GNB1	2782	P62873	5.20322	3.64394	6.35231	1.06054e-10	Guanine nucleotide-binding protein G(I)/G(S)/G(T) subunit beta-1 (Transducin beta chain 1)	G-protein coupled acetylcholine receptor signaling pathway; GTPase activity; GTPase binding; Ras protein signal transduction; cellular response to glucagon stimulus; energy reserve metabolic process; heterotrimeric G-protein complex; platelet activation; signal transducer activity; synaptic transmission		Guanine nucleotide-binding proteins (G proteins) are involved as a modulator or transducer in various transmembrane signaling systems. The beta and gamma chains are required for the GTPase activity, for replacement of GDP by GTP, and for G protein-effector interaction.		WD repeat G protein beta family
GPBAR1	GPBAR1 TGR5	151306	Q8TDU6	2.58321	2.15303	3.36281	0.000385761	G-protein coupled bile acid receptor 1 (G-protein coupled receptor GPCR19) (hGPCR19) (Membrane-type receptor for bile acids) (M-BAR) (hBG37) (BG37)	G-protein coupled receptor activity; integral to membrane; plasma membrane		Receptor for bile acid. Bile acid-binding induces its internalization, activation of extracellular signal-regulated kinase and intracellular cAMP production. May be involved in the suppression of macrophage functions by bile acids.	Cell membrane; Multi-pass membrane protein.	G-protein coupled receptor 1 family
HDLBP	HDLBP HBP VGL	3069	Q00341	5.24065	2.5066	5.80925	3.13758e-09	Vigilin (High density lipoprotein-binding protein) (HDL-binding protein)	RNA binding; cholesterol metabolic process; cytoplasm; high-density lipoprotein particle; lipid binding; lipid transport; nucleus; plasma membrane		Appears to play a role in cell sterol metabolism. It may function to protect cells from over-accumulation of cholesterol.	Cytoplasm. Nucleus.
IRF5	IRF5	3663	Q13568	3.03084	3.23467	4.43272	4.65252e-06	Interferon regulatory factor 5 (IRF-5)	cytosol; interferon-gamma-mediated signaling pathway; nucleus; protein binding; regulatory region DNA binding; sequence-specific DNA binding transcription factor activity; transcription, DNA-dependent; type I interferon-mediated signaling pathway	O43765		Nucleus.	IRF family
KIRREL3	KIRREL3 KIAA1867 NEPH2 UNQ5923/PRO4502/PRO19814	84623	Q8IZU9	2.20433	2.34931	3.22154	0.00063751	Kin of IRRE-like protein 3 (Kin of irregular chiasm-like protein 3) (Nephrin-like protein 2)	extracellular region; hemopoiesis; integral to membrane; plasma membrane; protein binding		Could be involved in the hematopoetic supportive capacity of stroma cells (By similarity).	Cell membrane; Single-pass type I membrane protein.	Immunoglobulin superfamily
LOC143678	C11orf94	143678	C9JXX5	2.29093	2.61432	3.47607	0.000254413	Uncharacterized protein C11orf94	extracellular region			Secreted (Potential).
MED8	MED8	112950	Q96G25	2.23286	2.12213	3.08044	0.00103348	Mediator of RNA polymerase II transcription subunit 8 (Activator-recruited cofactor 32 kDa component) (ARC32) (Mediator complex subunit 8)	RNA polymerase II transcription cofactor activity; mediator complex; protein binding	Q15369; Q15370	Component of the Mediator complex, a coactivator involved in the regulated transcription of nearly all RNA polymerase II-dependent genes. Mediator functions as a bridge to convey information from gene-specific regulatory proteins to the basal RNA polymerase II transcription machinery. Mediator is recruited to promoters by direct interactions with regulatory proteins and serves as a scaffold for t…	Nucleus (Probable).	Mediator complex subunit 8 family
NKX2-8	NKX2-8 NKX-2.8 NKX2G NKX2H	26257	O15522	2.35016	2.71068	3.58762	0.000166854	Homeobox protein Nkx-2.8 (Homeobox protein NK-2 homolog H)	double-stranded DNA binding; liver development; nucleus; sequence-specific DNA binding; sequence-specific DNA binding transcription factor activity; transcription from RNA polymerase II promoter			Nucleus (Probable).	NK-2 homeobox family
NUP153	NUP153	9972	P49790	3.14349	2.28838	3.88822	5.04915e-05	Nuclear pore complex protein Nup153 (153 kDa nucleoporin) (Nucleoporin Nup153)	DNA binding; carbohydrate metabolic process; cytokine-mediated signaling pathway; cytoplasm; glucose transport; interspecies interaction between organisms; mRNA transport; nuclear membrane; nuclear pore; nucleolus; nucleoplasm; protein transport; regulation of glucose transport; small molecule metabolic process; transmembrane transport; transporter activity; viral reproduction		Possible DNA-binding subunit of the nuclear pore complex (NPC). The repeat-containing domain may be involved in anchoring components of the pore complex to the pore membrane.	Nucleus, nuclear pore complex. Note=Located to the terminal ring structure of the nucleoplasmic cage. Tightly associated with the nuclear membrane and lamina (By similarity).
PSMD1	PSMD1	5707	Q99460	3.91788	2.54402	4.67138	1.4959e-06	26S proteasome non-ATPase regulatory subunit 1 (26S proteasome regulatory subunit RPN2) (26S proteasome regulatory subunit S1) (26S proteasome subunit p112)	DNA damage response, signal transduction by p53 class mediator resulting in cell cycle arrest; G1/S transition of mitotic cell cycle; M/G1 transition of mitotic cell cycle; S phase of mitotic cell cycle; anaphase-promoting complex-dependent proteasomal ubiquitin-dependent protein catabolic process; antigen processing and presentation of exogenous peptide antigen via MHC class I, TAP-dependent; ap…		Acts as a regulatory subunit of the 26 proteasome which is involved in the ATP-dependent degradation of ubiquitinated proteins.		Proteasome subunit S1 family
PSMD12	PSMD12	5718	O00232	2.56414	4.65449	5.31404	5.36095e-08	26S proteasome non-ATPase regulatory subunit 12 (26S proteasome regulatory subunit RPN5) (26S proteasome regulatory subunit p55)	DNA damage response, signal transduction by p53 class mediator resulting in cell cycle arrest; G1/S transition of mitotic cell cycle; M/G1 transition of mitotic cell cycle; S phase of mitotic cell cycle; anaphase-promoting complex-dependent proteasomal ubiquitin-dependent protein catabolic process; antigen processing and presentation of exogenous peptide antigen via MHC class I, TAP-dependent; ap…		Acts as a regulatory subunit of the 26S proteasome which is involved in the ATP-dependent degradation of ubiquitinated proteins.		Proteasome subunit p55 family
PSMD13	PSMD13	5719	Q9UNM6	3.40926	2.57036	4.26964	9.78945e-06	26S proteasome non-ATPase regulatory subunit 13 (26S proteasome regulatory subunit RPN9) (26S proteasome regulatory subunit S11) (26S proteasome regulatory subunit p40.5)	DNA damage response, signal transduction by p53 class mediator resulting in cell cycle arrest; G1/S transition of mitotic cell cycle; M/G1 transition of mitotic cell cycle; S phase of mitotic cell cycle; anaphase-promoting complex-dependent proteasomal ubiquitin-dependent protein catabolic process; antigen processing and presentation of exogenous peptide antigen via MHC class I, TAP-dependent; ap…		Acts as a regulatory subunit of the 26S proteasome which is involved in the ATP-dependent degradation of ubiquitinated proteins.		Proteasome subunit S11 family
PSMD3	PSMD3	5709	O43242	2.49178	4.62719	5.25546	7.38266e-08	26S proteasome non-ATPase regulatory subunit 3 (26S proteasome regulatory subunit RPN3) (26S proteasome regulatory subunit S3) (Proteasome subunit p58)	DNA damage response, signal transduction by p53 class mediator resulting in cell cycle arrest; G1/S transition of mitotic cell cycle; M/G1 transition of mitotic cell cycle; S phase of mitotic cell cycle; anaphase-promoting complex-dependent proteasomal ubiquitin-dependent protein catabolic process; antigen processing and presentation of exogenous peptide antigen via MHC class I, TAP-dependent; ap…		Acts as a regulatory subunit of the 26 proteasome which is involved in the ATP-dependent degradation of ubiquitinated proteins.		Proteasome subunit S3 family
RNF150	RNF150 KIAA1214	57484	Q9ULK6	2.45883	3.90019	4.61056	2.00788e-06	RING finger protein 150	integral to membrane; zinc ion binding			Membrane; Single-pass type I membrane protein (Potential).
RNF25	RNF25	64320	Q96BH1	4.88256	2.23365	5.36923	3.95375e-08	E3 ubiquitin-protein ligase RNF25 (EC 6.3.2.-) (RING finger protein 25)	NF-kappaB binding; cytosol; nucleus; positive regulation of NF-kappaB transcription factor activity; ubiquitin-protein ligase activity; zinc ion binding		E3 ubiquitin-protein ligase that mediates ubiquitination and subsequent proteasomal degradation of NKD2 (By similarity). Stimulates transcription mediated by NF-kappa-B.
SCAMP4	SCAMP4	113178	Q969E2	3.78408	2.12496	4.33989	7.12755e-06	Secretory carrier-associated membrane protein 4 (Secretory carrier membrane protein 4)	integral to membrane; protein transport		Probably involved in membrane protein trafficking (By similarity).	Membrane; Multi-pass membrane protein.	SCAMP family
SCAND2	SCAND2	54581	Q9GZW5	3.30617	3.04518	4.49487	3.48066e-06	Putative SCAN domain-containing protein 2	nucleus; sequence-specific DNA binding transcription factor activity; viral reproduction			Nucleus (Potential).
SCHIP1	SCHIP1	29970	Q9P0W5	4.30195	2.66809	5.06217	2.07261e-07	Schwannomin-interacting protein 1 (SCHIP-1)	cytoplasm; identical protein binding	Itself; P55036; Q9UIL1; Q5T200		Cytoplasm. Note=Partially colocalizes with NF2 beneath the cytoplasmic membrane.
SFRS1	SRSF1 ASF SF2 SF2P33 SFRS1 OK/SW-cl.3	6426	Q07955	3.17657	2.15418	3.83811	6.19937e-05	Serine/arginine-rich splicing factor 1 (Alternative-splicing factor 1) (ASF-1) (Splicing factor, arginine/serine-rich 1) (pre-mRNA-splicing factor SF2, P33 subunit)	RNA binding; catalytic step 2 spliceosome; cytoplasm; mRNA 3'-end processing; mRNA export from nucleus; nuclear mRNA 5'-splice site recognition; nuclear speck; nucleotide binding; termination of RNA polymerase II transcription	Q86X95; P23511; Q9UBU9; Q96SB4; O70551; O54781	Plays a role in preventing exon skipping, ensuring the accuracy of splicing and regulating alternative splicing. Interacts with other spliceosomal components, via the RS domains, to form a bridge between the 5'- and 3'-splice site binding components, U1 snRNP and U2AF. Can stimulate binding of U1 snRNP to a 5'-splice site-containing pre-mRNA. Binds to purine-rich RNA sequences, either the octamer…	Cytoplasm. Nucleus speckle. Note=In nuclear speckles. Shuttles between the nucleus and the cytoplasm.	Splicing factor SR family
SLC43A3	SLC43A3 PSEC0252	29015	Q8NBI5	2.33106	3.27609	4.02077	2.90043e-05	Solute carrier family 43 member 3 (Protein FOAP-13)	integral to membrane; transmembrane transport		Putative transporter (By similarity).	Membrane; Multi-pass membrane protein (Potential).	SLC43A transporter (TC 2.A.1.44) family
SMG1	SMG1 ATX KIAA0421 LIP	23049	Q96Q15	3.56646	2.13372	4.156	1.61932e-05	Serine/threonine-protein kinase SMG1 (SMG-1) (hSMG-1) (EC 2.7.11.1) (61E3.4) (Lambda/iota protein kinase C-interacting protein) (Lambda-interacting protein)	ATP binding; DNA repair; cytosol; gene expression; mRNA export from nucleus; metal ion binding; nuclear-transcribed mRNA catabolic process, nonsense-mediated decay; nucleus; peptidyl-serine phosphorylation; phosphatidylinositol phosphorylation; protein autophosphorylation; protein binding; protein serine/threonine kinase activity	P11940; Q9HAU5	Serine/threonine protein kinase involved in both mRNA surveillance and genotoxic stress response pathways. Recognizes the substrate consensus sequence [ST]-Q. Plays a central role in nonsense-mediated decay (NMD) of mRNAs containing premature stop codons by phosphorylating UPF1/RENT1. Recruited by release factors to stalled ribosomes together with SMG8 and SMG9 (forming the SMG1C protein kinase c…	Nucleus. Cytoplasm.	PI3/PI4-kinase family
SPATA9	SPATA9	83890	Q9BWV2	2.14395	2.48681	3.2834	0.000512806	Spermatogenesis-associated protein 9 (Testis development protein NYD-SP16)	cell differentiation; integral to membrane; multicellular organismal development; spermatogenesis		May play a role in testicular development/spermatogenesis and may be an important factor in male infertility.	Membrane; Single-pass membrane protein (Potential).
TMCO3	TMCO3 C13orf11 UNQ2419/PRO4976	55002	Q6UWJ1	2.20405	2.20324	3.11642	0.000915304	Transmembrane and coiled-coil domain-containing protein 3 (Putative LAG1-interacting protein)	integral to membrane; solute:hydrogen antiporter activity		Probable Na(+)/H(+) antiporter (By similarity).	Membrane; Multi-pass membrane protein (Potential).	Monovalent cation:proton antiporter 2 (CPA2) transporter (TC 2.A.37) family
TRPM3	TRPM3 KIAA1616 LTRPC3	80036	Q9HCF6	3.00282	2.41049	3.85063	5.89063e-05	Transient receptor potential cation channel subfamily M member 3 (Long transient receptor potential channel 3) (LTrpC-3) (LTrpC3) (Melastatin-2) (MLSN2)	calcium channel activity; integral to membrane		Calcium channel mediating constitutive calcium ion entry. Its activity is increased by reduction in extracellular osmolarity, by store depletion and muscarinic receptor activation.	Membrane; Multi-pass membrane protein.	Transient receptor (TC 1.A.4) family, LTrpC subfamily, TRPM3 sub-subfamily
UBE2Q2	UBE2Q2	92912	Q8WVN8	2.55976	2.41229	3.51732	0.000217968	Ubiquitin-conjugating enzyme E2 Q2 (EC 6.3.2.19) (Ubiquitin carrier protein Q2) (Ubiquitin-protein ligase Q2)	ATP binding; cytoplasm; protein K48-linked ubiquitination; ubiquitin-protein ligase activity		Accepts ubiquitin from the E1 complex and catalyzes its covalent attachment to other proteins. In vitro catalyzes 'Lys-48'-linked polyubiquitination.	Cytoplasm.	Ubiquitin-conjugating enzyme family
UBL7	UBL7 BMSCUBP SB132	84993	Q96S82	2.78942	2.55277	3.7812	7.80357e-05	Ubiquitin-like protein 7 (Bone marrow stromal cell ubiquitin-like protein) (BMSC-UbP) (Ubiquitin-like protein SB132)
UBQLN4	UBQLN4 C1orf6 UBIN	56893	Q9NRR5	4.92633	2.42872	5.49249	1.98155e-08	Ubiquilin-4 (Ataxin-1 ubiquitin-like-interacting protein A1U)	cytosol; endoplasmic reticulum membrane; nucleus; protein binding	P54253; P26885; P55198; Q9NR12; Q9Y5P3; Q13049; O95201		Nucleus. Cytoplasm. Endoplasmic reticulum (Probable). Note=May associate with the endoplasmic reticulum.
ZBTB16	ZBTB16 PLZF ZNF145	7704	Q05516	2.30088	3.75275	4.40195	5.36401e-06	Zinc finger and BTB domain-containing protein 16 (Promyelocytic leukemia zinc finger protein) (Zinc finger protein 145) (Zinc finger protein PLZF)	DNA binding; PML body; apoptotic process; cartilage development; central nervous system development; mesonephros development; myeloid cell differentiation; negative regulation of myeloid cell differentiation; negative regulation of transcription, DNA-dependent; nuclear speck; positive regulation of cartilage development; positive regulation of chondrocyte differentiation; positive regulation of f…	Itself; P68104; P29590; P29590-5; Q9NYJ8	Probable transcription factor. May play a role in myeloid maturation and in the development and/or maintenance of other differentiated tissues. Probable substrate-recognition component of an E3 ubiquitin-protein ligase complex which mediates the ubiquitination and subsequent proteasomal degradation of target proteins.	Nucleus.	Krueppel C2H2-type zinc-finger protein family
ZDHHC5	ZDHHC5 KIAA1748 ZNF375	25921	Q9C0B5	3.37102	2.71491	4.32834	7.51197e-06	Palmitoyltransferase ZDHHC5 (EC 2.3.1.-) (Zinc finger DHHC domain-containing protein 5) (DHHC-5) (Zinc finger protein 375)	integral to membrane; transferase activity, transferring acyl groups; zinc ion binding			Membrane; Multi-pass membrane protein (Potential).	DHHC palmitoyltransferase family, ERF2/ZDHHC9 subfamily
ZNF280C	ZNF280C SUHW3 ZNF633	55609	Q8ND82	2.37373	2.53071	3.46974	0.000260479	Zinc finger protein 280C (Suppressor of hairy wing homolog 3) (Zinc finger protein 633)	DNA binding; nucleus; regulation of transcription, DNA-dependent; transcription, DNA-dependent; zinc ion binding		May function as a transcription factor.	Nucleus (Potential).
ZNF654	ZNF654	55279	Q8IZM8	2.84219	4.49729	5.32012	5.18505e-08	Zinc finger protein 654 (Melanoma-associated antigen)	DNA binding; nucleus; regulation of transcription, DNA-dependent; transcription, DNA-dependent; zinc ion binding		May be involved in transcriptional regulation (By similarity).	Nucleus (Probable).	Krueppel C2H2-type zinc-finger protein family
